# Supplementary material for: Exosomal circRNA-100338 promotes hepatocellular carcinoma metastasis via enhancing invasiveness and angiogenesis
Source: J Exp Clin Cancer Res. 2020 Jan 23;39:20. doi: 10.1186/s13046-020-1529-9 (PMC6979009; doi:10.1186/s13046-020-1529-9)
Supplement: Supplementary file 2 — Additional file 2: Figure S1E. The number of invaded cells (n) [file 13046_2020_1529_MOESM2_ESM.xlsx]

## Sheet: Figure 1E
Figure 1E The number of invaded cells (n)
Group	The number of invaded cells
Control	15
	9
	8
	7
	8
	8
	7
	8
	8
	7
	12
	8
	8
	9
	8
MHCC97H-exo	16
	16
	13
	18
	18
	20
	14
	14
	13
	15
	14
	16
	10
	16
	17
