# Supplementary material for: Exosomal circRNA-100338 promotes hepatocellular carcinoma metastasis via enhancing invasiveness and angiogenesis
Source: J Exp Clin Cancer Res. 2020 Jan 23;39:20. doi: 10.1186/s13046-020-1529-9 (PMC6979009; doi:10.1186/s13046-020-1529-9)
Supplement: Supplementary file 3 — Additional file 3: Figure S2A. Relative expression of circRNA-100,338, Figure S2B. Relative expression of circRNA-100,338, Figure S2C. The number of invaded cells (n), Figure S2D. The number of invaded cells (n), Figure S2F. MMP9 activity (ng/mL), Figure S2G. MMP9 activity (ng/mL) [file 13046_2020_1529_MOESM3_ESM.xlsx]

## Sheet: Figure 2A
Figure 2A Relative expression of circRNA-100338
Group	CircRNA-100338 expression	Group
MHCC97H	0.751	MHCC97H
	0.705	MHCC97H
	0.628	MHCC97H
Hep3B	0.097	Hep3B
	0.125	Hep3B
	0.103	Hep3B
MHCC97H-exo	1	MHCC97H-exo
	1.665	MHCC97H-exo
	1.194	MHCC97H-exo
Hep3B-exo	0.276	Hep3B-exo
	0.241	Hep3B-exo
	0.262	Hep3B-exo

## Sheet: Figure 2B
Figure 2B Relative expression of circRNA-100338
Group	Supernatant exosomal circRNA-100338 level
L02	0.078
	0.095
	0.054
HLE	0.438
	0.307
	0.456
Huh7	0.547
	0.505
	0.476
Hep3B	0.276
	0.241
	0.262
BEL7402	0.745
	0.714
	0.607
SMMC7721	0.909
	0.824
	0.697
MHCC97L	1.037
	0.901
	0.894
MHCC97H	1
	1.665
	1.194
HCCLM3	1.963
	1.524
	1.418
HCCLM6	2.126
	1.955
	1.638

## Sheet: Figure 2C
Figure 2C The number of invaded cells (n)
Cell line	Group	The number of invaded cells
MHCC97L	Scramble-exo	34
		29
		25
		26
		26
		35
		37
		31
		31
		36
		27
		28
		29
		30
		28
	CIRC-exo	40
		38
		35
		36
		37
		39
		33
		34
		35
		34
		23
		34
		29
		37
		34
SMMC7721	Scramble-exo	25
		29
		24
		26
		27
		29
		30
		33
		31
		20
		27
		28
		29
		23
		30
	CIRC-exo	36
		38
		35
		36
		22
		29
		33
		34
		35
		30
		23
		34
		29
		30
		24
BEL7402	Scramble-exo	21
		27
		23
		26
		27
		22
		26
		25
		31
		16
		24
		29
		24
		23
		17
	CIRC-exo	23
		24
		35
		29
		22
		25
		20
		34
		35
		31
		23
		34
		29
		30
		24
Hep3B	Scramble-exo	14
		15
		13
		18
		18
		21
		14
		16
		13
		15
		14
		16
		10
		16
		19
	CIRC-exo	22
		16
		18
		21
		18
		22
		14
		19
		18
		22
		14
		23
		11
		16
		20
Huh7	Scramble-exo	14
		24
		23
		18
		27
		22
		14
		23
		19
		15
		22
		27
		20
		22
		18
	CIRC-exo	20
		22
		27
		26
		20
		22
		18
		31
		32
		26
		20
		34
		24
		21
		22
HLE	Scramble-exo	15
		22
		15
		20
		14
		20
		22
		21
		17
		16
		20
		19
		18
		17
		15
	CIRC-exo	25
		26
		23
		19
		24
		20
		17
		14
		23
		24
		18
		25
		19
		20
		27

## Sheet: Figure 2D
Figure 2D The number of invaded cells (n)
Cell line	Group	The number of invaded cells
MHCC97L	siNC-exo	33
		29
		25
		25
		26
		35
		34
		31
		33
		36
		27
		28
		29
		30
		27
	siCIRC-exo	25
		23
		24
		25
		16
		26
		27
		25
		24
		23
		28
		19
		20
		25
		18
SMMC7721	siNC-exo	24
		28
		24
		26
		26
		29
		31
		32
		28
		20
		27
		28
		27
		23
		31
	siCIRC-exo	25
		16
		22
		20
		24
		23
		20
		23
		20
		20
		23
		21
		15
		18
		22
BEL7402	siNC-exo	20
		28
		24
		23
		26
		20
		28
		25
		32
		18
		23
		25
		27
		22
		19
	siCIRC-exo	18
		19
		21
		17
		15
		16
		12
		24
		20
		21
		23
		18
		17
		15
		19
Hep3B	siNC-exo	13
		16
		14
		19
		17
		23
		15
		13
		14
		17
		13
		16
		13
		12
		14
	siCIRC-exo	10
		4
		8
		6
		5
		7
		10
		7
		11
		6
		5
		7
		8
		8
		9
Huh7	siNC-exo	17
		21
		23
		14
		27
		15
		17
		18
		19
		15
		22
		30
		25
		21
		19
	siCIRC-exo	10
		14
		16
		15
		16
		14
		17
		15
		16
		17
		9
		13
		12
		11
		16
HLE	siNC-exo	15
		22
		16
		19
		15
		18
		22
		21
		19
		18
		16
		19
		16
		19
		14
	siCIRC-exo	16
		14
		13
		8
		10
		11
		12
		14
		12
		9
		10
		14
		13
		7
		8

## Sheet: Figure 2F
Figure 2F MMP9 activity (ng/mL)
Cell line	Group	Supernatant MMP9 level by ELISA analysis (ng/mL)
MHCC97L	Scramble-exo	55.084
		53.219
		60.375
	CIRC-exo	81.782
		84.4275
		93.1525
SMMC7721	Scramble-exo	41.187
		49.885
		46.891
	CIRC-exo	66.369
		69.257
		57.158
BEL7402	Scramble-exo	37.039
		41.263
		35.144
	CIRC-exo	51.681
		53.254
		46.175
Hep3B	Scramble-exo	14.352
		15.993
		12.247
	CIRC-exo	24.136
		18.352
		20.849
Huh7	Scramble-exo	29.334
		29.051
		34.338
	CIRC-exo	42.585
		46.653
		37.153
HLE	Scramble-exo	23.309
		20.187
		26.352
	CIRC-exo	28.886
		35.527
		34.296

## Sheet: Figure 2G
Figure 2G MMP9 activity (ng/mL)
Cell line	Group	Supernatant MMP9 level by ELISA analysis (ng/mL)
MHCC97L	siNC-exo	54.784
		53.019
		59.868
	siCIRC-exo	44.692
		45.275
		51.353
SMMC7721	siNC-exo	41.635
		49.114
		46.636
	siCIRC-exo	39.653
		35.626
		34.565
BEL7402	siNC-exo	36.952
		40.885
		35.202
	siCIRC-exo	27.635
		31.028
		32.201
Hep3B	siNC-exo	13.383
		11.596
		14.568
	siCIRC-exo	10.532
		11.028
		10.147
Huh7	siNC-exo	30.168
		28.062
		32.258
	siCIRC-exo	24.553
		26.901
		23.224
HLE	siNC-exo	23.638
		20.714
		24.707
	siCIRC-exo	16.698
		19.553
		18.464
