# Supplementary material for: Exosomal circRNA-100338 promotes hepatocellular carcinoma metastasis via enhancing invasiveness and angiogenesis
Source: J Exp Clin Cancer Res. 2020 Jan 23;39:20. doi: 10.1186/s13046-020-1529-9 (PMC6979009; doi:10.1186/s13046-020-1529-9)
Supplement: Supplementary file 4 — Additional file 4: Figure S3C. Relative circRNA-100,338 expression, Figure S3D. Proliferation of HUVEC cells, Figure S3E. Proliferation of HUVEC cells, Figure S3H. The number of migrated cells (n) [file 13046_2020_1529_MOESM4_ESM.xlsx]

## Sheet: Figure 3C
Figure 3C Relative circRNA-100338 expression
Group	Relative circRNA-100338 expression
HUVEC-Hep3B-CIRC-exo	9.848
	7.572
	9.929
HUVEC-Hep3B-scramble-exo	1
	1.763
	1.358
HUVEC-MHCC97H-siCIRC-exo	2.042
	1.929
	2.248
HUVEC-MHCC97H-siNC-exo	5.391
	5.354
	5.915
HUVEC-BC	0.715
	0.696
	0.742

## Sheet: Figure 3D
Figure 3D Proliferation of HUVEC cells
Group	MHCC97H-siCIRC-exo					MHCC97H-siNC-exo					HUVEC-BC
TIME (hour)	0	24	48	72	96	0	24	48	72	96	0	24	48	72	96
OD450 nm	0.206	0.272	0.365	0.638	1.286	0.205	0.279	0.456	0.931	1.598	0.178	0.267	0.328	0.669	1.335
	0.207	0.279	0.356	0.744	1.101	0.2	0.276	0.433	0.86	1.533	0.185	0.255	0.407	0.728	1.372
	0.204	0.281	0.351	0.649	1.157	0.214	0.285	0.435	0.852	1.525	0.194	0.249	0.353	0.714	1.446
	0.196	0.277	0.36	0.596	1.099	0.201	0.276	0.428	0.905	1.501	0.189	0.279	0.312	0.802	1.402
	0.203	0.279	0.359	0.697	1.227	0.201	0.287	0.426	0.87	1.515	0.186	0.282	0.367	0.749	1.315
	0.202	0.295	0.359	0.639	1.277	0.202	0.304	0.439	0.908	1.578	0.192	0.264	0.275	0.693	1.388

## Sheet: Figure 3E
Figure 3E Proliferation of HUVEC cells
Group	Hep3B-CIRC-exo					Hep3B-scramble-exo
TIME (hour)	0	24	48	72	96	0	24	48	72	96
OD450 nm	0.194	0.288	0.565	0.998	1.878	0.201	0.289	0.428	0.815	1.549
	0.2	0.289	0.486	0.971	1.688	0.192	0.281	0.39	0.84	1.498
	0.198	0.285	0.487	0.989	1.827	0.187	0.27	0.391	0.707	1.518
	0.198	0.287	0.489	0.976	1.726	0.191	0.273	0.383	0.793	1.398
	0.203	0.28	0.515	0.989	1.799	0.201	0.272	0.378	0.859	1.491
	0.216	0.296	0.494	1.189	1.986	0.188	0.291	0.396	0.807	1.518

## Sheet: Figure 3H
Figure 3H The number of migrated cells (n)
Group	The number of migrated cells		Group	The number of migrated cells
siNC	49		Scramble	61
	48			53
	65			55
	50			51
	56			43
	60			53
	59			46
	63			63
	65			46
siCIRC	35		CIRC	73
	33			79
	45			60
	31			65
	41			84
	42			70
	35			71
	42			89
	43			70
HUVEC-BC	50		HUVEC-BC	48
	47			55
	43			39
	38			42
	49			44
	45			38
	57			40
	46			54
	53			43

## Sheet: Figure 3I
Figure 3I Permeation (%)
Group	Permeation (%)
MHCC97H-siCIRC-exo	12.25
	12.5
	14.68
MHCC97H-siNC-exo	17.01
	16.94
	19.64
Hep3B-CIRC-exo	23.77
	21.27
	20.67
Hep3B-scramble-exo	13.26
	13.32
	15.76
