# Supplementary material for: Exosomal circRNA-100338 promotes hepatocellular carcinoma metastasis via enhancing invasiveness and angiogenesis
Source: J Exp Clin Cancer Res. 2020 Jan 23;39:20. doi: 10.1186/s13046-020-1529-9 (PMC6979009; doi:10.1186/s13046-020-1529-9)
Supplement: Supplementary file 6 — Additional file 6: Figure S5A. Relative expression of exosomal circRNA-100,338, Figure S5C. Tumor volume (cm3), Figure S5D. MVD (n), Figure S5E. MMP9 level by ELISA analysis (ng/mg protein), Figure S5F. The mean number of lung metastatic nodules (n), Figure S5G. Percentage of Ki67 in lung metastatic nodules (%) [file 13046_2020_1529_MOESM6_ESM.xlsx]

## Sheet: Figure 5A
Figure 5A Relative expression of exosomal circRNA-100338
Group	CircRNA-100338 expression
siNC-exo	1.6352
	1.8957
	1.7218
	1.4562
	1.5983
siCIRC-exo	1.1058
	1.1864
	1.0528
	1.2109
	1.3025
siNC-exo+IFN-alpha	1.1186
	0.9685
	0.8759
	1.1567
	1.0856
siCIRC-exo+IFN-alpha	0.7581
	0.6897
	0.5654
	0.6937
	0.5998

## Sheet: Figure 5C
Figure 5C Tumor volume (cm3 )
Group	a	b	V=a× b2 × π/6
siNC-exo	2.3	1.8	3.89988
	2.2	1.9	4.15631
	2.6	1.5	3.0615
	2.1	1.9	3.96739
	2.2	1.8	3.73032
siCIRC-exo	1.7	1.6	2.27755
	1.8	1.7	2.72238
	1.6	1.5	1.884
	1.8	1.6	2.41152
	1.5	1.4	1.5386
siNC-exo+IFN-alpha	1.6	1.5	1.884
	1.5	1.4	1.5386
	1.4	1.3	1.23821
	1.7	1.4	1.74375
	1.3	1.1	0.823203
siCIRC-exo+IFN-alpha	1.2	1.1	0.75988
	1.3	1	0.680333
	1	0.9	0.4239
	1.2	1	0.628
	1.1	1	0.575667

## Sheet: Figure 5D
Figure 5D MVD (n)
Group	MVD (n)
siNC-exo	66
	57
	55
	60
	54
siCIRC-exo	53
	42
	56
	44
	40
siNC-exo+IFN-alpha	31
	28
	23
	24
	26
siCIRC-exo+IFN-alpha	21
	12
	10
	15
	13

## Sheet: Figure 5E
Figure 5E MMP9 level by ELISA analysis (ng/mg protein)
Group	MMP9 level by ELISA analysis
siNC-exo	66.35
	70.87
	75.42
	63.59
	61.28
siCIRC-exo	43.68
	51.08
	57.41
	50.27
	39.77
siNC-exo+IFN-alpha	35.63
	30.29
	29.35
	26.67
	24.84
siCIRC-exo+IFN-alpha	22.35
	16.52
	12.17
	16.38
	13.55

## Sheet: Figure 5F
Figure 5F The mean number of lung metastatic nodules (n)
Group	The mean number of lung metastatic nodules
siNC-exo	16
	17
	15
	13
	19
siCIRC-exo	14
	15
	12
	10
	9
siNC-exo+IFN-alpha	10
	8
	9
	13
	7
siCIRC-exo+IFN-alpha	8
	7
	4
	5
	5

## Sheet: Figure 5G
Figure 5G Percentage of Ki67 in lung metastatic nodules (%)
Group	Ki67 (%)
siNC-exo	84.5
	90.1
	91.3
	82.8
	72.1
siCIRC-exo	61.6
	68.4
	74.3
	61.8
	73.5
siNC-exo+IFN-alpha	69.3
	56.1
	61.9
	63.7
	67.2
siCIRC-exo+IFN-alpha	45.5
	50.4
	55.8
	47.9
	60.3
