# Supplementary material for: Exosomal circRNA-100338 promotes hepatocellular carcinoma metastasis via enhancing invasiveness and angiogenesis
Source: J Exp Clin Cancer Res. 2020 Jan 23;39:20. doi: 10.1186/s13046-020-1529-9 (PMC6979009; doi:10.1186/s13046-020-1529-9)
Supplement: Supplementary file 8 — Additional file 8. The proteins interacting with circRNA-100338 in HUVEC. [file 13046_2020_1529_MOESM8_ESM.xlsx]

## Sheet: 1
Master Protein Accession	Entry name	Description	Coverage [%]	# Peptides	# PSMs	# Unique Peptides	# AAs	MW [kDa]	calc. pI	Score Sequest HT: Sequest HT	Abundances	# Protein Groups
Q07065	CKAP4_HUMAN	Cytoskeleton-associated protein 4 OS=Homo sapiens OX=9606 GN=CKAP4 PE=1 SV=2	69	46	75	46	602	66	5.92	228.37	1.75826e+09	1
P12956	XRCC6_HUMAN	X-ray repair cross-complementing protein 6 OS=Homo sapiens OX=9606 GN=XRCC6 PE=1 SV=2	56	39	69	39	609	69.8	6.64	195.8	7.28197e+08	1
P04264	K2C1_HUMAN	Keratin, type II cytoskeletal 1 OS=Homo sapiens OX=9606 GN=KRT1 PE=1 SV=6	62	37	58	31	644	66	8.12	187.5	1.00716e+09	1
P14618	KPYM_HUMAN	Pyruvate kinase PKM OS=Homo sapiens OX=9606 GN=PKM PE=1 SV=4	66	31	47	31	531	57.9	7.84	149.8	3.02184e+08	1
P08670	VIME_HUMAN	Vimentin OS=Homo sapiens OX=9606 GN=VIM PE=1 SV=4	66	39	66	37	466	53.6	5.12	185.57	7.7149e+08	1
P46063	RECQ1_HUMAN	ATP-dependent DNA helicase Q1 OS=Homo sapiens OX=9606 GN=RECQL PE=1 SV=3	51	28	53	28	649	73.4	7.88	159.21	4.3221e+08	1
O60506	HNRPQ_HUMAN	Heterogeneous nuclear ribonucleoprotein Q OS=Homo sapiens OX=9606 GN=SYNCRIP PE=1 SV=2	49	28	48	23	623	69.6	8.59	142.58	3.49769e+08	1
P52272	HNRPM_HUMAN	Heterogeneous nuclear ribonucleoprotein M OS=Homo sapiens OX=9606 GN=HNRNPM PE=1 SV=3	61	41	58	41	730	77.5	8.7	156.57	3.376e+08	1
Q13283	G3BP1_HUMAN	Ras GTPase-activating protein-binding protein 1 OS=Homo sapiens OX=9606 GN=G3BP1 PE=1 SV=1	59	21	54	21	466	52.1	5.52	161.03	4.57992e+08	1
P54136	SYRC_HUMAN	Arginine--tRNA ligase, cytoplasmic OS=Homo sapiens OX=9606 GN=RARS PE=1 SV=2	57	37	54	37	660	75.3	6.68	150.8	4.20961e+08	1
Q96AE4	FUBP1_HUMAN	Far upstream element-binding protein 1 OS=Homo sapiens OX=9606 GN=FUBP1 PE=1 SV=3	52	31	46	24	644	67.5	7.61	117.56	5.95e+08	1
P35908	K22E_HUMAN	Keratin, type II cytoskeletal 2 epidermal OS=Homo sapiens OX=9606 GN=KRT2 PE=1 SV=2	53	29	37	21	639	65.4	8	120.54	1.81118e+08	1
P35527	K1C9_HUMAN	Keratin, type I cytoskeletal 9 OS=Homo sapiens OX=9606 GN=KRT9 PE=1 SV=3	58	23	30	23	623	62	5.24	102.69	2.17765e+08	1
P14868	SYDC_HUMAN	Aspartate--tRNA ligase, cytoplasmic OS=Homo sapiens OX=9606 GN=DARS PE=1 SV=2	56	25	39	25	501	57.1	6.55	116.19	3.14314e+08	1
Q9NVI7	ATD3A_HUMAN	ATPase family AAA domain-containing protein 3A OS=Homo sapiens OX=9606 GN=ATAD3A PE=1 SV=2	44	26	42	10	634	71.3	8.98	115.21	1.88819e+08	1
P61978	HNRPK_HUMAN	Heterogeneous nuclear ribonucleoprotein K OS=Homo sapiens OX=9606 GN=HNRNPK PE=1 SV=1	46	23	41	23	463	50.9	5.54	119.22	5.42452e+08	1
P09914	IFIT1_HUMAN	Interferon-induced protein with tetratricopeptide repeats 1 OS=Homo sapiens OX=9606 GN=IFIT1 PE=1 SV=2	38	14	26	14	478	55.3	7.2	94.9	6.50824e+07	1
P13645	K1C10_HUMAN	Keratin, type I cytoskeletal 10 OS=Homo sapiens OX=9606 GN=KRT10 PE=1 SV=6	51	27	35	24	584	58.8	5.21	107.64	4.77892e+08	1
Q92841	DDX17_HUMAN	Probable ATP-dependent RNA helicase DDX17 OS=Homo sapiens OX=9606 GN=DDX17 PE=1 SV=2	43	26	39	20	729	80.2	8.27	94.29	8.60747e+07	1
Q9NZI8	IF2B1_HUMAN	Insulin-like growth factor 2 mRNA-binding protein 1 OS=Homo sapiens OX=9606 GN=IGF2BP1 PE=1 SV=2	47	25	34	20	577	63.4	9.2	97.65	1.29401e+08	1
Q14258	TRI25_HUMAN	E3 ubiquitin/ISG15 ligase TRIM25 OS=Homo sapiens OX=9606 GN=TRIM25 PE=1 SV=2	51	26	36	26	630	70.9	8.09	101.88	2.37611e+08	1
Q15233	NONO_HUMAN	Non-POU domain-containing octamer-binding protein OS=Homo sapiens OX=9606 GN=NONO PE=1 SV=4	38	20	35	19	471	54.2	8.95	99.48	1.92316e+08	1
Q92945	FUBP2_HUMAN	Far upstream element-binding protein 2 OS=Homo sapiens OX=9606 GN=KHSRP PE=1 SV=4	42	23	28	19	711	73.1	7.3	82.44	7.04699e+07	1
P04843	RPN1_HUMAN	Dolichyl-diphosphooligosaccharide--protein glycosyltransferase subunit 1 OS=Homo sapiens OX=9606 GN=RPN1 PE=1 SV=1	49	22	27	22	607	68.5	6.38	86.43	7.59054e+07	1
P27694	RFA1_HUMAN	Replication protein A 70 kDa DNA-binding subunit OS=Homo sapiens OX=9606 GN=RPA1 PE=1 SV=2	42	20	28	20	616	68.1	7.21	83.68	2.07771e+08	1
O00425	IF2B3_HUMAN	Insulin-like growth factor 2 mRNA-binding protein 3 OS=Homo sapiens OX=9606 GN=IGF2BP3 PE=1 SV=2	47	25	34	19	579	63.7	8.87	94.93	2.72492e+08	1
P17844	DDX5_HUMAN	Probable ATP-dependent RNA helicase DDX5 OS=Homo sapiens OX=9606 GN=DDX5 PE=1 SV=1	42	28	40	22	614	69.1	8.92	106.9	3.61781e+08	1
P13010	XRCC5_HUMAN	X-ray repair cross-complementing protein 5 OS=Homo sapiens OX=9606 GN=XRCC5 PE=1 SV=3	35	26	35	26	732	82.7	5.81	91.53	7.5652e+07	1
Q9Y262	EIF3L_HUMAN	Eukaryotic translation initiation factor 3 subunit L OS=Homo sapiens OX=9606 GN=EIF3L PE=1 SV=1	39	24	35	24	564	66.7	6.34	98.47	3.27928e+08	1
P19338	NUCL_HUMAN	Nucleolin OS=Homo sapiens OX=9606 GN=NCL PE=1 SV=3	33	25	34	25	710	76.6	4.7	89.66	3.81735e+08	1
Q96I24	FUBP3_HUMAN	Far upstream element-binding protein 3 OS=Homo sapiens OX=9606 GN=FUBP3 PE=1 SV=2	58	26	34	22	572	61.6	8.38	87.65	1.07282e+08	1
Q9Y6M1	IF2B2_HUMAN	Insulin-like growth factor 2 mRNA-binding protein 2 OS=Homo sapiens OX=9606 GN=IGF2BP2 PE=1 SV=2	44	25	33	21	599	66.1	8.46	90.36	2.33212e+08	1
P68104	EF1A1_HUMAN	Elongation factor 1-alpha 1 OS=Homo sapiens OX=9606 GN=EEF1A1 PE=1 SV=1	44	15	24	15	462	50.1	9.01	81.17	7.32528e+08	1
Q15046	SYK_HUMAN	Lysine--tRNA ligase OS=Homo sapiens OX=9606 GN=KARS PE=1 SV=3	34	20	28	20	597	68	6.35	72.14	9.1141e+07	1
Q15650	TRIP4_HUMAN	Activating signal cointegrator 1 OS=Homo sapiens OX=9606 GN=TRIP4 PE=1 SV=4	44	22	25	22	581	66.1	7.85	70.07	3.80374e+07	1
O00571	DDX3X_HUMAN	ATP-dependent RNA helicase DDX3X OS=Homo sapiens OX=9606 GN=DDX3X PE=1 SV=3	36	22	31	4	662	73.2	7.18	87.93	1.02835e+08	1
P11142	HSP7C_HUMAN	Heat shock cognate 71 kDa protein OS=Homo sapiens OX=9606 GN=HSPA8 PE=1 SV=1	32	19	23	16	646	70.9	5.52	68.12	4.73105e+07	1
Q8WVV9	HNRLL_HUMAN	Heterogeneous nuclear ribonucleoprotein L-like OS=Homo sapiens OX=9606 GN=HNRNPLL PE=1 SV=1	39	15	22	15	542	60	7.72	66.1	5.55651e+07	1
Q5T9A4	ATD3B_HUMAN	ATPase family AAA domain-containing protein 3B OS=Homo sapiens OX=9606 GN=ATAD3B PE=1 SV=1	37	22	32	6	648	72.5	9.2	81.6	1.77147e+07	1
O15523	DDX3Y_HUMAN	ATP-dependent RNA helicase DDX3Y OS=Homo sapiens OX=9606 GN=DDX3Y PE=1 SV=2	35	21	31	3	660	73.1	7.55	84.65	5669262	1
P47897	SYQ_HUMAN	Glutamine--tRNA ligase OS=Homo sapiens OX=9606 GN=QARS PE=1 SV=1	37	25	29	25	775	87.7	7.15	77.42	5.78502e+07	1
P34897	GLYM_HUMAN	Serine hydroxymethyltransferase, mitochondrial OS=Homo sapiens OX=9606 GN=SHMT2 PE=1 SV=3	47	20	28	20	504	56	8.53	69.73	1.60985e+08	1
P14866	HNRPL_HUMAN	Heterogeneous nuclear ribonucleoprotein L OS=Homo sapiens OX=9606 GN=HNRNPL PE=1 SV=2	34	15	20	15	589	64.1	8.22	62.66	7.18029e+07	1
Q8WXF1	PSPC1_HUMAN	Paraspeckle component 1 OS=Homo sapiens OX=9606 GN=PSPC1 PE=1 SV=1	33	16	22	16	523	58.7	6.67	61.95	1.96006e+08	1
P26599	PTBP1_HUMAN	Polypyrimidine tract-binding protein 1 OS=Homo sapiens OX=9606 GN=PTBP1 PE=1 SV=1	37	16	23	14	531	57.2	9.17	67.14	3.28681e+08	1
Q16666	IF16_HUMAN	Gamma-interferon-inducible protein 16 OS=Homo sapiens OX=9606 GN=IFI16 PE=1 SV=3	28	19	23	19	785	88.2	9.28	51.92	4.32037e+07	1
Q9H0J9	PAR12_HUMAN	Protein mono-ADP-ribosyltransferase PARP12 OS=Homo sapiens OX=9606 GN=PARP12 PE=1 SV=1	31	20	23	19	701	79	8.51	55.07	3.73957e+07	1
P51114	FXR1_HUMAN	Fragile X mental retardation syndrome-related protein 1 OS=Homo sapiens OX=9606 GN=FXR1 PE=1 SV=3	30	19	23	18	621	69.7	6.15	57.34	6.81492e+07	1
Q9UN86	G3BP2_HUMAN	Ras GTPase-activating protein-binding protein 2 OS=Homo sapiens OX=9606 GN=G3BP2 PE=1 SV=2	38	14	23	14	482	54.1	5.55	58.26	6.89531e+07	1
Q8NCA5	FA98A_HUMAN	Protein FAM98A OS=Homo sapiens OX=9606 GN=FAM98A PE=1 SV=1	38	11	13	11	519	55.4	9.03	45.22	2.26251e+07	1
P06576	ATPB_HUMAN	ATP synthase subunit beta, mitochondrial OS=Homo sapiens OX=9606 GN=ATP5F1B PE=1 SV=3	35	13	15	13	529	56.5	5.4	40.9	1.54989e+07	1
O43390	HNRPR_HUMAN	Heterogeneous nuclear ribonucleoprotein R OS=Homo sapiens OX=9606 GN=HNRNPR PE=1 SV=1	25	14	19	9	633	70.9	8.13	47.56	1.32516e+07	1
P35637	FUS_HUMAN	RNA-binding protein FUS OS=Homo sapiens OX=9606 GN=FUS PE=1 SV=1	16	9	14	7	526	53.4	9.36	43.86	7.93484e+07	1
P04844	RPN2_HUMAN	Dolichyl-diphosphooligosaccharide--protein glycosyltransferase subunit 2 OS=Homo sapiens OX=9606 GN=RPN2 PE=1 SV=3	23	10	12	10	631	69.2	5.69	46.73	2.76642e+07	1
O75746	CMC1_HUMAN	Calcium-binding mitochondrial carrier protein Aralar1 OS=Homo sapiens OX=9606 GN=SLC25A12 PE=1 SV=2	24	16	18	10	678	74.7	8.38	43.68	1.9301e+07	1
Q00839	HNRPU_HUMAN	Heterogeneous nuclear ribonucleoprotein U OS=Homo sapiens OX=9606 GN=HNRNPU PE=1 SV=6	25	19	21	19	825	90.5	6	50.95	1.73371e+08	1
P46781	RS9_HUMAN	40S ribosomal protein S9 OS=Homo sapiens OX=9606 GN=RPS9 PE=1 SV=3	70	21	28	21	194	22.6	10.65	70.41	5.87877e+08	1
O60716	CTND1_HUMAN	Catenin delta-1 OS=Homo sapiens OX=9606 GN=CTNND1 PE=1 SV=1	19	16	18	16	968	108.1	6.23	41.11	2.60861e+07	1
Q86UE4	LYRIC_HUMAN	Protein LYRIC OS=Homo sapiens OX=9606 GN=MTDH PE=1 SV=2	30	13	16	13	582	63.8	9.32	44.96	3.93672e+07	1
O15371	EIF3D_HUMAN	Eukaryotic translation initiation factor 3 subunit D OS=Homo sapiens OX=9606 GN=EIF3D PE=1 SV=1	29	13	16	13	548	63.9	6.05	45.67	4.61634e+07	1
P11940	PABP1_HUMAN	Polyadenylate-binding protein 1 OS=Homo sapiens OX=9606 GN=PABPC1 PE=1 SV=2	23	13	17	9	636	70.6	9.5	44.74	2.75347e+07	1
Q14554	PDIA5_HUMAN	Protein disulfide-isomerase A5 OS=Homo sapiens OX=9606 GN=PDIA5 PE=1 SV=1	27	12	14	12	519	59.6	7.91	36.53	1.87337e+07	1
P07437	TBB5_HUMAN	Tubulin beta chain OS=Homo sapiens OX=9606 GN=TUBB PE=1 SV=2	41	14	17	3	444	49.6	4.89	45.63	2.62067e+07	1
O75534	CSDE1_HUMAN	Cold shock domain-containing protein E1 OS=Homo sapiens OX=9606 GN=CSDE1 PE=1 SV=2	24	19	23	19	798	88.8	6.25	42.9	1.74039e+08	1
O14879	IFIT3_HUMAN	Interferon-induced protein with tetratricopeptide repeats 3 OS=Homo sapiens OX=9606 GN=IFIT3 PE=1 SV=1	32	11	13	11	490	56	5.2	36.66	3.28149e+07	1
P68371	TBB4B_HUMAN	Tubulin beta-4B chain OS=Homo sapiens OX=9606 GN=TUBB4B PE=1 SV=1	35	12	16	1	445	49.8	4.89	43.59	1.69606e+06	1
Q9UHX1	PUF60_HUMAN	Poly(U)-binding-splicing factor PUF60 OS=Homo sapiens OX=9606 GN=PUF60 PE=1 SV=1	35	13	16	13	559	59.8	5.29	44.47	1.97752e+07	1
P02768	ALBU_HUMAN	Serum albumin OS=Homo sapiens OX=9606 GN=ALB PE=1 SV=2	30	19	22	19	609	69.3	6.28	42.61	5.9228e+08	1
Q9UNW9	NOVA2_HUMAN	RNA-binding protein Nova-2 OS=Homo sapiens OX=9606 GN=NOVA2 PE=1 SV=1	31	15	18	10	492	49	8.16	51.58	8.41154e+07	1
P13647	K2C5_HUMAN	Keratin, type II cytoskeletal 5 OS=Homo sapiens OX=9606 GN=KRT5 PE=1 SV=3	23	16	20	9	590	62.3	7.74	54.4	1.82183e+07	1
P16989	YBOX3_HUMAN	Y-box-binding protein 3 OS=Homo sapiens OX=9606 GN=YBX3 PE=1 SV=4	36	13	15	10	372	40.1	9.77	41.14	4.54197e+07	1
Q9UJS0	CMC2_HUMAN	Calcium-binding mitochondrial carrier protein Aralar2 OS=Homo sapiens OX=9606 GN=SLC25A13 PE=1 SV=2	23	14	15	8	675	74.1	8.62	36.26	9.8469e+06	1
P67809	YBOX1_HUMAN	Nuclease-sensitive element-binding protein 1 OS=Homo sapiens OX=9606 GN=YBX1 PE=1 SV=3	44	8	9	5	324	35.9	9.88	34.31	8.79065e+06	1
P04259	K2C6B_HUMAN	Keratin, type II cytoskeletal 6B OS=Homo sapiens OX=9606 GN=KRT6B PE=1 SV=5	21	14	18	5	564	60	8	48.77	1.8745e+06	1
Q9BW19	KIFC1_HUMAN	Kinesin-like protein KIFC1 OS=Homo sapiens OX=9606 GN=KIFC1 PE=1 SV=2	25	12	12	12	673	73.7	8.98	32.82	1.70146e+07	1
P23246	SFPQ_HUMAN	Splicing factor, proline- and glutamine-rich OS=Homo sapiens OX=9606 GN=SFPQ PE=1 SV=2	20	12	14	11	707	76.1	9.44	38.31	3.71539e+07	1
Q00341	VIGLN_HUMAN	Vigilin OS=Homo sapiens OX=9606 GN=HDLBP PE=1 SV=2	12	13	15	13	1268	141.4	6.87	39.43	1.81889e+07	1
Q96TA2	YMEL1_HUMAN	ATP-dependent zinc metalloprotease YME1L1 OS=Homo sapiens OX=9606 GN=YME1L1 PE=1 SV=2	24	14	14	14	773	86.4	8.76	36.36	1.34768e+07	1
Q99755	PI51A_HUMAN	Phosphatidylinositol 4-phosphate 5-kinase type-1 alpha OS=Homo sapiens OX=9606 GN=PIP5K1A PE=1 SV=1	28	16	17	16	562	62.6	8.21	34.38	17057561	1
Q07666	KHDR1_HUMAN	KH domain-containing, RNA-binding, signal transduction-associated protein 1 OS=Homo sapiens OX=9606 GN=KHDRBS1 PE=1 SV=1	28	10	15	10	443	48.2	8.66	41.1	1.14546e+08	1
P08240	SRPRA_HUMAN	Signal recognition particle receptor subunit alpha OS=Homo sapiens OX=9606 GN=SRPRA PE=1 SV=2	27	16	18	16	638	69.8	8.95	40.8	3.98098e+07	1
Q9NVH1	DJC11_HUMAN	DnaJ homolog subfamily C member 11 OS=Homo sapiens OX=9606 GN=DNAJC11 PE=1 SV=2	31	16	18	16	559	63.2	8.4	39.6	2.42581e+07	1
Q7KZF4	SND1_HUMAN	Staphylococcal nuclease domain-containing protein 1 OS=Homo sapiens OX=9606 GN=SND1 PE=1 SV=1	18	13	14	13	910	101.9	7.17	34.33	1.54339e+07	1
Q14498	RBM39_HUMAN	RNA-binding protein 39 OS=Homo sapiens OX=9606 GN=RBM39 PE=1 SV=2	25	10	11	10	530	59.3	10.1	31.58	2.054e+07	1
P25705	ATPA_HUMAN	ATP synthase subunit alpha, mitochondrial OS=Homo sapiens OX=9606 GN=ATP5F1A PE=1 SV=1	28	13	13	13	553	59.7	9.13	34.52	2.97087e+07	1
P07814	SYEP_HUMAN	Bifunctional glutamate/proline--tRNA ligase OS=Homo sapiens OX=9606 GN=EPRS PE=1 SV=5	12	15	15	15	1512	170.5	7.33	38.19	1.67227e+07	1
Q9UJA5	TRM6_HUMAN	tRNA (adenine(58)-N(1))-methyltransferase non-catalytic subunit TRM6 OS=Homo sapiens OX=9606 GN=TRMT6 PE=1 SV=1	32	14	15	14	497	55.8	7.55	35	1.51966e+07	1
P27816	MAP4_HUMAN	Microtubule-associated protein 4 OS=Homo sapiens OX=9606 GN=MAP4 PE=1 SV=3	10	9	11	9	1152	120.9	5.43	34.17	3.04672e+07	1
Q86XZ4	SPAS2_HUMAN	Spermatogenesis-associated serine-rich protein 2 OS=Homo sapiens OX=9606 GN=SPATS2 PE=1 SV=1	24	11	12	10	545	59.5	8.9	28.93	2.05151e+07	1
Q16630	CPSF6_HUMAN	Cleavage and polyadenylation specificity factor subunit 6 OS=Homo sapiens OX=9606 GN=CPSF6 PE=1 SV=2	21	11	13	11	551	59.2	7.15	36.26	5.83085e+07	1
P26641	EF1G_HUMAN	Elongation factor 1-gamma OS=Homo sapiens OX=9606 GN=EEF1G PE=1 SV=3	25	10	12	10	437	50.1	6.67	28.85	1.49692e+07	1
O95340	PAPS2_HUMAN	Bifunctional 3'-phosphoadenosine 5'-phosphosulfate synthase 2 OS=Homo sapiens OX=9606 GN=PAPSS2 PE=1 SV=2	24	13	15	13	614	69.5	8.03	39.66	1.99687e+07	1
Q9P258	RCC2_HUMAN	Protein RCC2 OS=Homo sapiens OX=9606 GN=RCC2 PE=1 SV=2	27	13	14	13	522	56	8.78	37.7	1.73375e+07	1
P68363	TBA1B_HUMAN	Tubulin alpha-1B chain OS=Homo sapiens OX=9606 GN=TUBA1B PE=1 SV=1	35	12	13	1	451	50.1	5.06	27.03	2.11505e+07	1
Q9NZB2	F120A_HUMAN	Constitutive coactivator of PPAR-gamma-like protein 1 OS=Homo sapiens OX=9606 GN=FAM120A PE=1 SV=2	13	12	12	12	1118	121.8	8.88	31.2	7.6664e+06	1
Q71U36	TBA1A_HUMAN	Tubulin alpha-1A chain OS=Homo sapiens OX=9606 GN=TUBA1A PE=1 SV=1	35	12	13	1	451	50.1	5.06	26.7	372502	1
Q96PK6	RBM14_HUMAN	RNA-binding protein 14 OS=Homo sapiens OX=9606 GN=RBM14 PE=1 SV=2	16	9	9	9	669	69.4	9.67	25.84	8.41197e+06	1
P62701	RS4X_HUMAN	40S ribosomal protein S4, X isoform OS=Homo sapiens OX=9606 GN=RPS4X PE=1 SV=2	36	9	12	5	263	29.6	10.15	33.47	1.38118e+08	1
P02533	K1C14_HUMAN	Keratin, type I cytoskeletal 14 OS=Homo sapiens OX=9606 GN=KRT14 PE=1 SV=4	29	14	14	11	472	51.5	5.16	36.3	1.31771e+07	1
Q04637	IF4G1_HUMAN	Eukaryotic translation initiation factor 4 gamma 1 OS=Homo sapiens OX=9606 GN=EIF4G1 PE=1 SV=4	11	15	16	15	1599	175.4	5.33	32.38	1.98223e+07	1
P42704	LPPRC_HUMAN	Leucine-rich PPR motif-containing protein, mitochondrial OS=Homo sapiens OX=9606 GN=LRPPRC PE=1 SV=3	10	12	13	12	1394	157.8	6.13	24.33	8.25149e+06	1
Q7Z739	YTHD3_HUMAN	YTH domain-containing family protein 3 OS=Homo sapiens OX=9606 GN=YTHDF3 PE=1 SV=1	24	12	14	5	585	63.8	9.04	29.61	3.83955e+07	1
Q8NC51	PAIRB_HUMAN	Plasminogen activator inhibitor 1 RNA-binding protein OS=Homo sapiens OX=9606 GN=SERBP1 PE=1 SV=2	25	9	10	9	408	44.9	8.65	34.13	3.64154e+07	1
Q86YZ3	HORN_HUMAN	Hornerin OS=Homo sapiens OX=9606 GN=HRNR PE=1 SV=2	10	8	9	8	2850	282.2	10.04	26.73	3.92051e+06	1
Q6NUQ4	TM214_HUMAN	Transmembrane protein 214 OS=Homo sapiens OX=9606 GN=TMEM214 PE=1 SV=2	21	10	11	10	689	77.1	9.14	30.27	1.41449e+07	1
P08729	K2C7_HUMAN	Keratin, type II cytoskeletal 7 OS=Homo sapiens OX=9606 GN=KRT7 PE=1 SV=5	29	14	14	12	469	51.4	5.48	39.3	1.26781e+07	1
P22626	ROA2_HUMAN	Heterogeneous nuclear ribonucleoproteins A2/B1 OS=Homo sapiens OX=9606 GN=HNRNPA2B1 PE=1 SV=2	28	8	10	8	353	37.4	8.95	27.12	5.33564e+06	1
P09651	ROA1_HUMAN	Heterogeneous nuclear ribonucleoprotein A1 OS=Homo sapiens OX=9606 GN=HNRNPA1 PE=1 SV=5	25	6	8	6	372	38.7	9.13	21.81	5.94208e+06	1
Q14739	LBR_HUMAN	Delta(14)-sterol reductase OS=Homo sapiens OX=9606 GN=LBR PE=1 SV=2	20	11	12	11	615	70.7	9.36	30.55	2.7926e+07	1
P49748	ACADV_HUMAN	Very long-chain specific acyl-CoA dehydrogenase, mitochondrial OS=Homo sapiens OX=9606 GN=ACADVL PE=1 SV=1	23	12	12	12	655	70.3	8.75	29.67	1.17014e+07	1
Q66K74	MAP1S_HUMAN	Microtubule-associated protein 1S OS=Homo sapiens OX=9606 GN=MAP1S PE=1 SV=2	15	11	12	11	1059	112.1	7.3	28.06	9.95744e+06	1
P27635	RL10_HUMAN	60S ribosomal protein L10 OS=Homo sapiens OX=9606 GN=RPL10 PE=1 SV=4	29	8	13	8	214	24.6	10.08	33.02	5.18496e+07	1
Q9NUQ6	SPS2L_HUMAN	SPATS2-like protein OS=Homo sapiens OX=9606 GN=SPATS2L PE=1 SV=2	21	9	9	8	558	61.7	9.64	26.09	1.36177e+07	1
Q9BUF5	TBB6_HUMAN	Tubulin beta-6 chain OS=Homo sapiens OX=9606 GN=TUBB6 PE=1 SV=1	19	7	10	3	446	49.8	4.88	28	1.8458e+06	1
P09913	IFIT2_HUMAN	Interferon-induced protein with tetratricopeptide repeats 2 OS=Homo sapiens OX=9606 GN=IFIT2 PE=1 SV=1	23	10	11	10	472	54.6	6.76	27.1	1.44256e+07	1
Q8N684	CPSF7_HUMAN	Cleavage and polyadenylation specificity factor subunit 7 OS=Homo sapiens OX=9606 GN=CPSF7 PE=1 SV=1	28	11	12	11	471	52	8	26.63	2.65752e+07	1
P38646	GRP75_HUMAN	Stress-70 protein, mitochondrial OS=Homo sapiens OX=9606 GN=HSPA9 PE=1 SV=2	16	8	8	8	679	73.6	6.16	22.74	6.63546e+06	1
Q9NXV6	CARF_HUMAN	CDKN2A-interacting protein OS=Homo sapiens OX=9606 GN=CDKN2AIP PE=1 SV=3	22	10	10	10	580	61.1	9.01	23.17	1.03164e+07	1
P26368	U2AF2_HUMAN	Splicing factor U2AF 65 kDa subunit OS=Homo sapiens OX=9606 GN=U2AF2 PE=1 SV=4	23	6	8	6	475	53.5	9.09	20.18	1.36266e+07	1
P04745	AMY1_HUMAN	Alpha-amylase 1 OS=Homo sapiens OX=9606 GN=AMY1A PE=1 SV=2	17	7	9	7	511	57.7	6.93	21.3	1.06569e+07	1
Q6P1J9	CDC73_HUMAN	Parafibromin OS=Homo sapiens OX=9606 GN=CDC73 PE=1 SV=1	22	10	10	10	531	60.5	9.61	21.16	9.00432e+06	1
Q7KZI7	MARK2_HUMAN	Serine/threonine-protein kinase MARK2 OS=Homo sapiens OX=9606 GN=MARK2 PE=1 SV=2	12	7	8	6	788	87.9	9.72	18.47	7.14906e+06	1
Q01844	EWS_HUMAN	RNA-binding protein EWS OS=Homo sapiens OX=9606 GN=EWSR1 PE=1 SV=1	15	6	7	6	656	68.4	9.33	20.11	1.63303e+07	1
Q53H12	AGK_HUMAN	Acylglycerol kinase, mitochondrial OS=Homo sapiens OX=9606 GN=AGK PE=1 SV=2	25	8	9	8	422	47.1	8.09	23.39	6.79256e+06	1
P39656	OST48_HUMAN	Dolichyl-diphosphooligosaccharide--protein glycosyltransferase 48 kDa subunit OS=Homo sapiens OX=9606 GN=DDOST PE=1 SV=4	24	9	11	9	456	50.8	6.55	24.9	8.18951e+06	1
P55884	EIF3B_HUMAN	Eukaryotic translation initiation factor 3 subunit B OS=Homo sapiens OX=9606 GN=EIF3B PE=1 SV=3	14	10	11	10	814	92.4	5	24	8.04837e+06	1
Q13310	PABP4_HUMAN	Polyadenylate-binding protein 4 OS=Homo sapiens OX=9606 GN=PABPC4 PE=1 SV=1	14	8	10	4	644	70.7	9.26	21.52	2.09035e+06	1
Q86U38	NOP9_HUMAN	Nucleolar protein 9 OS=Homo sapiens OX=9606 GN=NOP9 PE=1 SV=1	15	8	9	8	636	69.4	7.28	17.49	6.86336e+06	1
Q3KQU3	MA7D1_HUMAN	MAP7 domain-containing protein 1 OS=Homo sapiens OX=9606 GN=MAP7D1 PE=1 SV=1	15	12	14	12	841	92.8	10.11	28.61	1.77884e+07	1
Q05048	CSTF1_HUMAN	Cleavage stimulation factor subunit 1 OS=Homo sapiens OX=9606 GN=CSTF1 PE=1 SV=1	18	6	8	6	431	48.3	6.58	23.26	6.38635e+06	1
Q9Y3Z3	SAMH1_HUMAN	Deoxynucleoside triphosphate triphosphohydrolase SAMHD1 OS=Homo sapiens OX=9606 GN=SAMHD1 PE=1 SV=2	19	12	12	12	626	72.2	7.14	24.28	1.26337e+07	1
Q5SW79	CE170_HUMAN	Centrosomal protein of 170 kDa OS=Homo sapiens OX=9606 GN=CEP170 PE=1 SV=1	8	10	10	10	1584	175.2	7.11	17.04	7.30781e+06	1
Q9UBU9	NXF1_HUMAN	Nuclear RNA export factor 1 OS=Homo sapiens OX=9606 GN=NXF1 PE=1 SV=1	18	9	10	9	619	70.1	8.51	21.93	9.07899e+06	1
Q5U651	RAIN_HUMAN	Ras-interacting protein 1 OS=Homo sapiens OX=9606 GN=RASIP1 PE=1 SV=1	13	9	9	9	963	103.4	7.96	16.63	2.49774e+06	1
P51116	FXR2_HUMAN	Fragile X mental retardation syndrome-related protein 2 OS=Homo sapiens OX=9606 GN=FXR2 PE=1 SV=2	14	7	7	5	673	74.2	6.23	18.92	2.57936e+06	1
B5ME19	EIFCL_HUMAN	Eukaryotic translation initiation factor 3 subunit C-like protein OS=Homo sapiens OX=9606 GN=EIF3CL PE=3 SV=1	14	12	12	12	914	105.4	5.64	21.35	1.58448e+07	1
Q9BYJ9	YTHD1_HUMAN	YTH domain-containing family protein 1 OS=Homo sapiens OX=9606 GN=YTHDF1 PE=1 SV=1	15	7	9	2	559	60.8	8.79	21.84	386612	1
O95319	CELF2_HUMAN	CUGBP Elav-like family member 2 OS=Homo sapiens OX=9606 GN=CELF2 PE=1 SV=1	12	6	7	5	508	54.3	8.76	17.84	7.19714e+06	1
Q9Y3I0	RTCB_HUMAN	tRNA-splicing ligase RtcB homolog OS=Homo sapiens OX=9606 GN=RTCB PE=1 SV=1	20	9	9	9	505	55.2	7.23	23.99	7.7263e+06	1
Q9BZZ5	API5_HUMAN	Apoptosis inhibitor 5 OS=Homo sapiens OX=9606 GN=API5 PE=1 SV=3	16	8	9	8	524	59	7.34	22.42	1.50762e+07	1
P36957	ODO2_HUMAN	Dihydrolipoyllysine-residue succinyltransferase component of 2-oxoglutarate dehydrogenase complex, mitochondrial OS=Homo sapiens OX=9606 GN=DLST PE=1 SV=4	20	8	8	8	453	48.7	8.95	21.24	1.12237e+07	1
P18621	RL17_HUMAN	60S ribosomal protein L17 OS=Homo sapiens OX=9606 GN=RPL17 PE=1 SV=3	37	7	10	7	184	21.4	10.17	24.25	6.7806e+07	1
Q96T60	PNKP_HUMAN	Bifunctional polynucleotide phosphatase/kinase OS=Homo sapiens OX=9606 GN=PNKP PE=1 SV=1	19	9	10	9	521	57	8.46	24.44	2.69552e+07	1
Q6UWP8	SBSN_HUMAN	Suprabasin OS=Homo sapiens OX=9606 GN=SBSN PE=1 SV=2	15	2	3	2	590	60.5	7.01	16.89	1.60791e+06	1
P22090	RS4Y1_HUMAN	40S ribosomal protein S4, Y isoform 1 OS=Homo sapiens OX=9606 GN=RPS4Y1 PE=1 SV=2	26	6	8	2	263	29.4	10.24	18.59	4.3784e+06	1
Q9H223	EHD4_HUMAN	EH domain-containing protein 4 OS=Homo sapiens OX=9606 GN=EHD4 PE=1 SV=1	19	8	9	7	541	61.1	6.76	15.31	5.77821e+06	1
Q9BU23	LMF2_HUMAN	Lipase maturation factor 2 OS=Homo sapiens OX=9606 GN=LMF2 PE=1 SV=2	9	5	6	5	707	79.6	10.1	15.62	1.16908e+07	1
Q14444	CAPR1_HUMAN	Caprin-1 OS=Homo sapiens OX=9606 GN=CAPRIN1 PE=1 SV=2	15	7	10	7	709	78.3	5.25	19.78	6.71618e+06	1
Q9H845	ACAD9_HUMAN	Acyl-CoA dehydrogenase family member 9, mitochondrial OS=Homo sapiens OX=9606 GN=ACAD9 PE=1 SV=1	17	10	10	10	621	68.7	7.96	23.67	6.44803e+06	1
Q8TCJ2	STT3B_HUMAN	Dolichyl-diphosphooligosaccharide--protein glycosyltransferase subunit STT3B OS=Homo sapiens OX=9606 GN=STT3B PE=1 SV=1	12	10	10	8	826	93.6	8.91	18.85	6.57488e+06	1
P23396	RS3_HUMAN	40S ribosomal protein S3 OS=Homo sapiens OX=9606 GN=RPS3 PE=1 SV=2	44	10	11	10	243	26.7	9.66	20.51	1.79783e+07	1
P27448	MARK3_HUMAN	MAP/microtubule affinity-regulating kinase 3 OS=Homo sapiens OX=9606 GN=MARK3 PE=1 SV=5	10	6	7	5	753	84.4	9.57	12.87	2.4168e+06	1
P02545	LMNA_HUMAN	Prelamin-A/C OS=Homo sapiens OX=9606 GN=LMNA PE=1 SV=1	13	8	9	8	664	74.1	7.02	17.33	8.24776e+06	1
P04406	G3P_HUMAN	Glyceraldehyde-3-phosphate dehydrogenase OS=Homo sapiens OX=9606 GN=GAPDH PE=1 SV=3	23	6	6	6	335	36	8.46	14.81	5.23534e+06	1
Q9BYK8	HELZ2_HUMAN	Helicase with zinc finger domain 2 OS=Homo sapiens OX=9606 GN=HELZ2 PE=1 SV=6	3	8	8	8	2649	294.5	7.49	16.8	2.74133e+06	1
Q86Y07	VRK2_HUMAN	Serine/threonine-protein kinase VRK2 OS=Homo sapiens OX=9606 GN=VRK2 PE=1 SV=3	15	6	6	6	508	58.1	8.84	13.45	3.8165e+06	1
P41091	IF2G_HUMAN	Eukaryotic translation initiation factor 2 subunit 3 OS=Homo sapiens OX=9606 GN=EIF2S3 PE=1 SV=3	14	6	8	6	472	51.1	8.4	21.38	8459191	1
Q00059	TFAM_HUMAN	Transcription factor A, mitochondrial OS=Homo sapiens OX=9606 GN=TFAM PE=1 SV=1	26	7	9	7	246	29.1	9.72	21.81	3.03344e+07	1
P31943	HNRH1_HUMAN	Heterogeneous nuclear ribonucleoprotein H OS=Homo sapiens OX=9606 GN=HNRNPH1 PE=1 SV=4	13	4	5	4	449	49.2	6.3	16.86	8321817	1
P23368	MAOM_HUMAN	NAD-dependent malic enzyme, mitochondrial OS=Homo sapiens OX=9606 GN=ME2 PE=1 SV=1	11	6	7	6	584	65.4	7.61	16.27	11124291	1
P39748	FEN1_HUMAN	Flap endonuclease 1 OS=Homo sapiens OX=9606 GN=FEN1 PE=1 SV=1	15	5	6	5	380	42.6	8.62	15.73	8.75298e+06	1
Q15149	PLEC_HUMAN	Plectin OS=Homo sapiens OX=9606 GN=PLEC PE=1 SV=3	2	8	8	8	4684	531.5	5.96	17.77	1.78054e+07	1
P30153	2AAA_HUMAN	Serine/threonine-protein phosphatase 2A 65 kDa regulatory subunit A alpha isoform OS=Homo sapiens OX=9606 GN=PPP2R1A PE=1 SV=4	12	6	6	6	589	65.3	5.11	14.7	1.47943e+07	1
P35269	T2FA_HUMAN	General transcription factor IIF subunit 1 OS=Homo sapiens OX=9606 GN=GTF2F1 PE=1 SV=2	14	5	5	5	517	58.2	7.49	15.13	6.10269e+06	1
P60228	EIF3E_HUMAN	Eukaryotic translation initiation factor 3 subunit E OS=Homo sapiens OX=9606 GN=EIF3E PE=1 SV=1	18	7	7	7	445	52.2	6.04	13.29	2.72748e+06	1
Q13573	SNW1_HUMAN	SNW domain-containing protein 1 OS=Homo sapiens OX=9606 GN=SNW1 PE=1 SV=1	18	7	7	7	536	61.5	9.52	15.11	5.58773e+06	1
Q86V48	LUZP1_HUMAN	Leucine zipper protein 1 OS=Homo sapiens OX=9606 GN=LUZP1 PE=1 SV=2	8	8	8	8	1076	120.2	8.5	10.65	3.63446e+06	1
Q9BY44	EIF2A_HUMAN	Eukaryotic translation initiation factor 2A OS=Homo sapiens OX=9606 GN=EIF2A PE=1 SV=3	16	7	7	7	585	64.9	8.87	12.09	3.95028e+06	1
Q9H078	CLPB_HUMAN	Caseinolytic peptidase B protein homolog OS=Homo sapiens OX=9606 GN=CLPB PE=1 SV=1	9	6	6	6	707	78.7	9.01	17.38	8.94419e+06	1
P42167	LAP2B_HUMAN	Lamina-associated polypeptide 2, isoforms beta/gamma OS=Homo sapiens OX=9606 GN=TMPO PE=1 SV=2	15	5	5	5	454	50.6	9.38	12.36	2.98058e+06	1
P49917	DNLI4_HUMAN	DNA ligase 4 OS=Homo sapiens OX=9606 GN=LIG4 PE=1 SV=2	7	6	6	6	911	103.9	7.96	9.42	1.17794e+06	1
P53396	ACLY_HUMAN	ATP-citrate synthase OS=Homo sapiens OX=9606 GN=ACLY PE=1 SV=3	8	8	8	8	1101	120.8	7.33	12.22	5.1074e+06	1
P51659	DHB4_HUMAN	Peroxisomal multifunctional enzyme type 2 OS=Homo sapiens OX=9606 GN=HSD17B4 PE=1 SV=3	9	5	5	5	736	79.6	8.84	12.89	2.19839e+06	1
O95470	SGPL1_HUMAN	Sphingosine-1-phosphate lyase 1 OS=Homo sapiens OX=9606 GN=SGPL1 PE=1 SV=3	17	8	8	8	568	63.5	9.16	10.56	5.7042e+06	1
Q00537	CDK17_HUMAN	Cyclin-dependent kinase 17 OS=Homo sapiens OX=9606 GN=CDK17 PE=1 SV=2	13	7	8	7	523	59.5	9.03	14.55	5.81288e+06	1
Q9Y224	RTRAF_HUMAN	RNA transcription, translation and transport factor protein OS=Homo sapiens OX=9606 GN=RTRAF PE=1 SV=1	24	5	6	5	244	28.1	6.65	11.8	5.50695e+06	1
Q6PKG0	LARP1_HUMAN	La-related protein 1 OS=Homo sapiens OX=9606 GN=LARP1 PE=1 SV=2	7	7	7	7	1096	123.4	8.82	12.11	3.39763e+06	1
Q9Y6K5	OAS3_HUMAN	2'-5'-oligoadenylate synthase 3 OS=Homo sapiens OX=9606 GN=OAS3 PE=1 SV=3	6	6	7	6	1087	121.1	8.4	15.58	1.81511e+06	1
P60709	ACTB_HUMAN	Actin, cytoplasmic 1 OS=Homo sapiens OX=9606 GN=ACTB PE=1 SV=1	21	7	7	7	375	41.7	5.48	15.45	1.63649e+07	1
Q53G44	IF44L_HUMAN	Interferon-induced protein 44-like OS=Homo sapiens OX=9606 GN=IFI44L PE=2 SV=3	15	5	5	5	452	51.3	6.79	13.58	3.04573e+06	1
P11021	BIP_HUMAN	Endoplasmic reticulum chaperone BiP OS=Homo sapiens OX=9606 GN=HSPA5 PE=1 SV=2	10	5	5	3	654	72.3	5.16	10.91	1.67367e+06	1
Q92499	DDX1_HUMAN	ATP-dependent RNA helicase DDX1 OS=Homo sapiens OX=9606 GN=DDX1 PE=1 SV=2	11	6	7	6	740	82.4	7.23	11.92	2.62011e+06	1
Q9NZN4	EHD2_HUMAN	EH domain-containing protein 2 OS=Homo sapiens OX=9606 GN=EHD2 PE=1 SV=2	13	7	8	6	543	61.1	6.46	16.1	4.46249e+06	1
P62081	RS7_HUMAN	40S ribosomal protein S7 OS=Homo sapiens OX=9606 GN=RPS7 PE=1 SV=1	32	7	8	7	194	22.1	10.1	18.66	1.27751e+08	1
Q6PI48	SYDM_HUMAN	Aspartate--tRNA ligase, mitochondrial OS=Homo sapiens OX=9606 GN=DARS2 PE=1 SV=1	12	7	7	7	645	73.5	8.02	8.8	2.58271e+06	1
P50416	CPT1A_HUMAN	Carnitine O-palmitoyltransferase 1, liver isoform OS=Homo sapiens OX=9606 GN=CPT1A PE=1 SV=2	8	6	6	6	773	88.3	8.65	10.72	5.63578e+06	1
Q15365	PCBP1_HUMAN	Poly(rC)-binding protein 1 OS=Homo sapiens OX=9606 GN=PCBP1 PE=1 SV=2	22	6	6	4	356	37.5	7.09	14.84	9.80466e+06	1
Q9UDY2	ZO2_HUMAN	Tight junction protein ZO-2 OS=Homo sapiens OX=9606 GN=TJP2 PE=1 SV=2	6	8	8	8	1190	133.9	7.4	15.89	1.02684e+07	1
Q9UJX3	APC7_HUMAN	Anaphase-promoting complex subunit 7 OS=Homo sapiens OX=9606 GN=ANAPC7 PE=1 SV=4	7	4	5	4	599	66.8	5.64	12.97	4.00271e+06	1
P46821	MAP1B_HUMAN	Microtubule-associated protein 1B OS=Homo sapiens OX=9606 GN=MAP1B PE=1 SV=2	3	6	6	6	2468	270.5	4.81	11.52	3.73024e+06	1
Q9UH99	SUN2_HUMAN	SUN domain-containing protein 2 OS=Homo sapiens OX=9606 GN=SUN2 PE=1 SV=3	11	5	5	5	717	80.3	6.73	10.69	946221	1
Q9P2E9	RRBP1_HUMAN	Ribosome-binding protein 1 OS=Homo sapiens OX=9606 GN=RRBP1 PE=1 SV=5	6	5	5	5	1410	152.4	8.6	11.04	6.56718e+06	1
P62753	RS6_HUMAN	40S ribosomal protein S6 OS=Homo sapiens OX=9606 GN=RPS6 PE=1 SV=1	14	3	4	3	249	28.7	10.84	9.18	11898006	1
Q12834	CDC20_HUMAN	Cell division cycle protein 20 homolog OS=Homo sapiens OX=9606 GN=CDC20 PE=1 SV=2	11	4	4	4	499	54.7	9.23	10.51	1.71118e+06	1
P46977	STT3A_HUMAN	Dolichyl-diphosphooligosaccharide--protein glycosyltransferase subunit STT3A OS=Homo sapiens OX=9606 GN=STT3A PE=1 SV=2	10	8	8	6	705	80.5	8.07	14.14	6.07313e+06	1
Q9Y230	RUVB2_HUMAN	RuvB-like 2 OS=Homo sapiens OX=9606 GN=RUVBL2 PE=1 SV=3	11	5	5	5	463	51.1	5.64	12.03	3.15039e+06	1
Q7Z2W4	ZCCHV_HUMAN	Zinc finger CCCH-type antiviral protein 1 OS=Homo sapiens OX=9606 GN=ZC3HAV1 PE=1 SV=3	5	4	4	3	902	101.4	8.4	10.66	2.23363e+06	1
Q8ND56	LS14A_HUMAN	Protein LSM14 homolog A OS=Homo sapiens OX=9606 GN=LSM14A PE=1 SV=3	14	4	4	4	463	50.5	9.52	9.48	2.96805e+06	1
P17987	TCPA_HUMAN	T-complex protein 1 subunit alpha OS=Homo sapiens OX=9606 GN=TCP1 PE=1 SV=1	12	5	5	5	556	60.3	6.11	8.45	1.76693e+06	1
Q9NVV4	PAPD1_HUMAN	Poly(A) RNA polymerase, mitochondrial OS=Homo sapiens OX=9606 GN=MTPAP PE=1 SV=1	13	8	8	8	582	66.1	9.04	15.33	2.23087e+07	1
P15880	RS2_HUMAN	40S ribosomal protein S2 OS=Homo sapiens OX=9606 GN=RPS2 PE=1 SV=2	23	8	8	8	293	31.3	10.24	17.22	5.06345e+07	1
Q96AQ6	PBIP1_HUMAN	Pre-B-cell leukemia transcription factor-interacting protein 1 OS=Homo sapiens OX=9606 GN=PBXIP1 PE=1 SV=1	9	6	6	6	731	80.6	5.33	10.69	2.21005e+06	1
Q86UK7	ZN598_HUMAN	E3 ubiquitin-protein ligase ZNF598 OS=Homo sapiens OX=9606 GN=ZNF598 PE=1 SV=1	6	4	4	4	904	98.6	8.4	12.05	3.04119e+06	1
P09874	PARP1_HUMAN	Poly [ADP-ribose] polymerase 1 OS=Homo sapiens OX=9606 GN=PARP1 PE=1 SV=4	5	4	4	4	1014	113	8.88	10.21	9.39711e+06	1
P04637	P53_HUMAN	Cellular tumor antigen p53 OS=Homo sapiens OX=9606 GN=TP53 PE=1 SV=4	16	5	5	5	393	43.6	6.79	13.13	5.58631e+06	1
P36578	RL4_HUMAN	60S ribosomal protein L4 OS=Homo sapiens OX=9606 GN=RPL4 PE=1 SV=5	18	6	6	6	427	47.7	11.06	10.72	3.08698e+06	1
Q13547	HDAC1_HUMAN	Histone deacetylase 1 OS=Homo sapiens OX=9606 GN=HDAC1 PE=1 SV=1	11	5	6	1	482	55.1	5.48	8.38	324449	1
Q02978	M2OM_HUMAN	Mitochondrial 2-oxoglutarate/malate carrier protein OS=Homo sapiens OX=9606 GN=SLC25A11 PE=1 SV=3	16	4	4	4	314	34	9.91	9.48	1.35808e+06	1
P49368	TCPG_HUMAN	T-complex protein 1 subunit gamma OS=Homo sapiens OX=9606 GN=CCT3 PE=1 SV=4	11	6	6	6	545	60.5	6.49	11.48	4.61913e+06	1
Q7Z417	NUFP2_HUMAN	Nuclear fragile X mental retardation-interacting protein 2 OS=Homo sapiens OX=9606 GN=NUFIP2 PE=1 SV=1	9	5	5	5	695	76.1	8.7	10.67	1.3049e+06	1
Q13042	CDC16_HUMAN	Cell division cycle protein 16 homolog OS=Homo sapiens OX=9606 GN=CDC16 PE=1 SV=2	9	5	5	5	620	71.6	5.85	8.82	3.88292e+06	1
Q92769	HDAC2_HUMAN	Histone deacetylase 2 OS=Homo sapiens OX=9606 GN=HDAC2 PE=1 SV=2	11	5	6	1	488	55.3	5.91	10.16	5.44271e+06	1
Q8WWM7	ATX2L_HUMAN	Ataxin-2-like protein OS=Homo sapiens OX=9606 GN=ATXN2L PE=1 SV=2	6	5	6	5	1075	113.3	8.59	11.14	4.04079e+06	1
P35251	RFC1_HUMAN	Replication factor C subunit 1 OS=Homo sapiens OX=9606 GN=RFC1 PE=1 SV=4	5	5	5	5	1148	128.2	9.36	9.47	781781	1
Q14157	UBP2L_HUMAN	Ubiquitin-associated protein 2-like OS=Homo sapiens OX=9606 GN=UBAP2L PE=1 SV=2	5	4	4	4	1087	114.5	7.11	9.67	2.0246e+06	1
P51513	NOVA1_HUMAN	RNA-binding protein Nova-1 OS=Homo sapiens OX=9606 GN=NOVA1 PE=1 SV=2	11	6	7	1	507	51.7	8.72	16.3	942948	1
Q7Z6J6	FRMD5_HUMAN	FERM domain-containing protein 5 OS=Homo sapiens OX=9606 GN=FRMD5 PE=1 SV=1	9	4	4	4	570	65	8.35	9.02	2.11731e+06	1
Q9H0D6	XRN2_HUMAN	5'-3' exoribonuclease 2 OS=Homo sapiens OX=9606 GN=XRN2 PE=1 SV=1	5	4	4	4	950	108.5	7.47	8.72	4.08753e+06	1
Q86W56	PARG_HUMAN	Poly(ADP-ribose) glycohydrolase OS=Homo sapiens OX=9606 GN=PARG PE=1 SV=1	4	3	3	3	976	111	6.43	7.75	928520	1
Q13557	KCC2D_HUMAN	Calcium/calmodulin-dependent protein kinase type II subunit delta OS=Homo sapiens OX=9606 GN=CAMK2D PE=1 SV=3	13	6	6	6	499	56.3	7.25	8.08	3.7393e+06	1
Q9P2K5	MYEF2_HUMAN	Myelin expression factor 2 OS=Homo sapiens OX=9606 GN=MYEF2 PE=1 SV=3	9	5	5	5	600	64.1	8.75	7.07	1.27723e+06	1
P62987	RL40_HUMAN	Ubiquitin-60S ribosomal protein L40 OS=Homo sapiens OX=9606 GN=UBA52 PE=1 SV=2	37	4	4	4	128	14.7	9.83	11.42	1.48399e+07	1
P78344	IF4G2_HUMAN	Eukaryotic translation initiation factor 4 gamma 2 OS=Homo sapiens OX=9606 GN=EIF4G2 PE=1 SV=1	7	5	5	5	907	102.3	7.14	5.28	638514	1
Q8N1G4	LRC47_HUMAN	Leucine-rich repeat-containing protein 47 OS=Homo sapiens OX=9606 GN=LRRC47 PE=1 SV=1	7	3	4	3	583	63.4	8.28	8.03	972854	1
Q5T8P6	RBM26_HUMAN	RNA-binding protein 26 OS=Homo sapiens OX=9606 GN=RBM26 PE=1 SV=3	5	5	5	4	1007	113.5	9.16	9.48	3.47278e+06	1
Q9Y6J9	TAF6L_HUMAN	TAF6-like RNA polymerase II p300/CBP-associated factor-associated factor 65 kDa subunit 6L OS=Homo sapiens OX=9606 GN=TAF6L PE=1 SV=1	9	4	4	4	622	67.8	8.97	11.68	2.13676e+06	1
Q9NZT1	CALL5_HUMAN	Calmodulin-like protein 5 OS=Homo sapiens OX=9606 GN=CALML5 PE=1 SV=2	32	3	3	3	146	15.9	4.44	7	341915	1
Q12874	SF3A3_HUMAN	Splicing factor 3A subunit 3 OS=Homo sapiens OX=9606 GN=SF3A3 PE=1 SV=1	8	4	4	4	501	58.8	5.38	9.88	1.16648e+06	1
P12236	ADT3_HUMAN	ADP/ATP translocase 3 OS=Homo sapiens OX=9606 GN=SLC25A6 PE=1 SV=4	19	6	6	1	298	32.8	9.74	13.83	8.03442e+07	1
Q9Y5A9	YTHD2_HUMAN	YTH domain-containing family protein 2 OS=Homo sapiens OX=9606 GN=YTHDF2 PE=1 SV=2	9	6	7	2	579	62.3	8.79	11.87	894769	1
Q8WU90	ZC3HF_HUMAN	Zinc finger CCCH domain-containing protein 15 OS=Homo sapiens OX=9606 GN=ZC3H15 PE=1 SV=1	11	3	3	3	426	48.6	5.31	7.74	1.89492e+06	1
Q7LGA3	HS2ST_HUMAN	Heparan sulfate 2-O-sulfotransferase 1 OS=Homo sapiens OX=9606 GN=HS2ST1 PE=1 SV=1	16	5	5	5	356	41.9	8.69	12.23	6.14553e+06	1
Q92804	RBP56_HUMAN	TATA-binding protein-associated factor 2N OS=Homo sapiens OX=9606 GN=TAF15 PE=1 SV=1	15	5	5	3	592	61.8	8.02	10.26		1
Q53GS9	SNUT2_HUMAN	U4/U6.U5 tri-snRNP-associated protein 2 OS=Homo sapiens OX=9606 GN=USP39 PE=1 SV=2	11	4	4	4	565	65.3	8.91	7.2	2.11716e+06	1
Q92626	PXDN_HUMAN	Peroxidasin homolog OS=Homo sapiens OX=9606 GN=PXDN PE=1 SV=2	5	6	7	6	1479	165.2	7.17	4.39	2.34679e+07	1
O96013	PAK4_HUMAN	Serine/threonine-protein kinase PAK 4 OS=Homo sapiens OX=9606 GN=PAK4 PE=1 SV=1	10	6	6	6	591	64	9.73	9.6	2.8605e+06	1
Q6P1M0	S27A4_HUMAN	Long-chain fatty acid transport protein 4 OS=Homo sapiens OX=9606 GN=SLC27A4 PE=1 SV=1	7	3	3	3	643	72	8.47	6.64	441635	1
P26196	DDX6_HUMAN	Probable ATP-dependent RNA helicase DDX6 OS=Homo sapiens OX=9606 GN=DDX6 PE=1 SV=2	10	4	5	4	483	54.4	8.66	9.53	3.26986e+06	1
Q9H4M9	EHD1_HUMAN	EH domain-containing protein 1 OS=Homo sapiens OX=9606 GN=EHD1 PE=1 SV=2	6	3	5	1	534	60.6	6.83	6.82	180997	1
Q9NYY8	FAKD2_HUMAN	FAST kinase domain-containing protein 2, mitochondrial OS=Homo sapiens OX=9606 GN=FASTKD2 PE=1 SV=1	9	5	5	5	710	81.4	8.05	6.8	800467	1
P46940	IQGA1_HUMAN	Ras GTPase-activating-like protein IQGAP1 OS=Homo sapiens OX=9606 GN=IQGAP1 PE=1 SV=1	3	5	5	5	1657	189.1	6.48	8.45	1.68081e+06	1
Q9BX10	GTPB2_HUMAN	GTP-binding protein 2 OS=Homo sapiens OX=9606 GN=GTPBP2 PE=1 SV=1	9	5	5	5	602	65.7	8.05	6.69	1.59621e+06	1
P84103	SRSF3_HUMAN	Serine/arginine-rich splicing factor 3 OS=Homo sapiens OX=9606 GN=SRSF3 PE=1 SV=1	23	4	5	3	164	19.3	11.65	10.71	1.88653e+07	1
Q9UQ35	SRRM2_HUMAN	Serine/arginine repetitive matrix protein 2 OS=Homo sapiens OX=9606 GN=SRRM2 PE=1 SV=2	2	3	3	3	2752	299.4	12.06	9.03	454433	1
P50281	MMP14_HUMAN	Matrix metalloproteinase-14 OS=Homo sapiens OX=9606 GN=MMP14 PE=1 SV=3	7	4	4	4	582	65.9	7.77	9.59	4.20224e+06	1
P38919	IF4A3_HUMAN	Eukaryotic initiation factor 4A-III OS=Homo sapiens OX=9606 GN=EIF4A3 PE=1 SV=4	9	3	4	3	411	46.8	6.73	8.97	1.2617e+06	1
P10809	CH60_HUMAN	60 kDa heat shock protein, mitochondrial OS=Homo sapiens OX=9606 GN=HSPD1 PE=1 SV=2	9	4	4	4	573	61	5.87	10.57	2.72082e+06	1
P23588	IF4B_HUMAN	Eukaryotic translation initiation factor 4B OS=Homo sapiens OX=9606 GN=EIF4B PE=1 SV=2	6	3	3	3	611	69.1	5.73	8	4.02111e+06	1
P61221	ABCE1_HUMAN	ATP-binding cassette sub-family E member 1 OS=Homo sapiens OX=9606 GN=ABCE1 PE=1 SV=1	12	5	5	5	599	67.3	8.34	11.13	2.36034e+06	1
Q06787	FMR1_HUMAN	Synaptic functional regulator FMR1 OS=Homo sapiens OX=9606 GN=FMR1 PE=1 SV=1	6	3	3	2	632	71.1	7.42	8.4	1.43612e+06	1
Q9H857	NT5D2_HUMAN	5'-nucleotidase domain-containing protein 2 OS=Homo sapiens OX=9606 GN=NT5DC2 PE=1 SV=1	8	4	4	4	520	60.7	6.77	8.78	498716	1
P30101	PDIA3_HUMAN	Protein disulfide-isomerase A3 OS=Homo sapiens OX=9606 GN=PDIA3 PE=1 SV=4	13	5	5	5	505	56.7	6.35	8.71	4.52461e+06	1
Q6ZUT6	CCD9B_HUMAN	Coiled-coil domain-containing protein 9B OS=Homo sapiens OX=9606 GN=CCDC9B PE=1 SV=1	8	3	3	3	534	57.3	9.13	7.58	1.85266e+06	1
Q00325	MPCP_HUMAN	Phosphate carrier protein, mitochondrial OS=Homo sapiens OX=9606 GN=SLC25A3 PE=1 SV=2	10	3	3	3	362	40.1	9.38	6.05	9.95374e+06	1
P50991	TCPD_HUMAN	T-complex protein 1 subunit delta OS=Homo sapiens OX=9606 GN=CCT4 PE=1 SV=4	9	5	5	5	539	57.9	7.83	11.11	1.18713e+07	1
P01040	CYTA_HUMAN	Cystatin-A OS=Homo sapiens OX=9606 GN=CSTA PE=1 SV=1	46	4	4	4	98	11	5.5	7	4.01002e+06	1
Q14527	HLTF_HUMAN	Helicase-like transcription factor OS=Homo sapiens OX=9606 GN=HLTF PE=1 SV=2	4	4	4	4	1009	113.9	8.6	9.9	2.31502e+06	1
P05161	ISG15_HUMAN	Ubiquitin-like protein ISG15 OS=Homo sapiens OX=9606 GN=ISG15 PE=1 SV=5	25	3	4	3	165	17.9	7.44	8.47	8.62381e+06	1
P48651	PTSS1_HUMAN	Phosphatidylserine synthase 1 OS=Homo sapiens OX=9606 GN=PTDSS1 PE=1 SV=1	9	3	3	3	473	55.5	8.43	5.74	880059	1
Q9NY93	DDX56_HUMAN	Probable ATP-dependent RNA helicase DDX56 OS=Homo sapiens OX=9606 GN=DDX56 PE=1 SV=1	10	5	5	5	547	61.6	9.26	9.36	1.16141e+06	1
Q9H267	VP33B_HUMAN	Vacuolar protein sorting-associated protein 33B OS=Homo sapiens OX=9606 GN=VPS33B PE=1 SV=2	8	5	5	5	617	70.5	6.71	10.93	3.85936e+06	1
P52926	HMGA2_HUMAN	High mobility group protein HMGI-C OS=Homo sapiens OX=9606 GN=HMGA2 PE=1 SV=1	21	2	2	2	109	11.8	10.62	5.8	936237	1
Q13418	ILK_HUMAN	Integrin-linked protein kinase OS=Homo sapiens OX=9606 GN=ILK PE=1 SV=2	10	5	5	5	452	51.4	8.07	6.29	2.71481e+06	1
P52292	IMA1_HUMAN	Importin subunit alpha-1 OS=Homo sapiens OX=9606 GN=KPNA2 PE=1 SV=1	10	3	3	3	529	57.8	5.4	5.69	319930	1
Q15427	SF3B4_HUMAN	Splicing factor 3B subunit 4 OS=Homo sapiens OX=9606 GN=SF3B4 PE=1 SV=1	9	2	2	2	424	44.4	8.56	6.19	1.25365e+06	1
Q9BZE4	NOG1_HUMAN	Nucleolar GTP-binding protein 1 OS=Homo sapiens OX=9606 GN=GTPBP4 PE=1 SV=3	7	4	4	4	634	73.9	9.5	7.45	1.6122e+06	1
Q9H0H5	RGAP1_HUMAN	Rac GTPase-activating protein 1 OS=Homo sapiens OX=9606 GN=RACGAP1 PE=1 SV=1	7	4	4	4	632	71	8.88	6.29	1.82039e+06	1
P12235	ADT1_HUMAN	ADP/ATP translocase 1 OS=Homo sapiens OX=9606 GN=SLC25A4 PE=1 SV=4	16	5	5	1	298	33	9.76	10.92	165013	1
Q2PZI1	D19L1_HUMAN	Probable C-mannosyltransferase DPY19L1 OS=Homo sapiens OX=9606 GN=DPY19L1 PE=2 SV=1	5	3	3	3	675	77.3	8.95	7.82	2.78355e+06	1
P53007	TXTP_HUMAN	Tricarboxylate transport protein, mitochondrial OS=Homo sapiens OX=9606 GN=SLC25A1 PE=1 SV=2	15	5	5	5	311	34	9.89	2.14	2.36681e+06	1
Q9UJX2	CDC23_HUMAN	Cell division cycle protein 23 homolog OS=Homo sapiens OX=9606 GN=CDC23 PE=1 SV=3	8	5	5	5	597	68.8	7.02	3.7	2.85278e+06	1
Q92879	CELF1_HUMAN	CUGBP Elav-like family member 1 OS=Homo sapiens OX=9606 GN=CELF1 PE=1 SV=2	9	4	4	3	486	52	8.46	10.93	2.70519e+06	1
O95758	PTBP3_HUMAN	Polypyrimidine tract-binding protein 3 OS=Homo sapiens OX=9606 GN=PTBP3 PE=1 SV=2	7	5	5	3	552	59.7	9.04	9.67	6.00729e+06	1
P41252	SYIC_HUMAN	Isoleucine--tRNA ligase, cytoplasmic OS=Homo sapiens OX=9606 GN=IARS PE=1 SV=2	5	6	6	6	1262	144.4	6.15	4.17	1.40363e+06	1
P12273	PIP_HUMAN	Prolactin-inducible protein OS=Homo sapiens OX=9606 GN=PIP PE=1 SV=1	27	3	3	3	146	16.6	8.05	4.87	970563	1
P05141	ADT2_HUMAN	ADP/ATP translocase 2 OS=Homo sapiens OX=9606 GN=SLC25A5 PE=1 SV=7	15	5	5	1	298	32.8	9.69	11.36	5.47988e+06	1
Q9Y6V7	DDX49_HUMAN	Probable ATP-dependent RNA helicase DDX49 OS=Homo sapiens OX=9606 GN=DDX49 PE=1 SV=1	12	4	4	4	483	54.2	9.06	7.18	2.21138e+06	1
P18887	XRCC1_HUMAN	DNA repair protein XRCC1 OS=Homo sapiens OX=9606 GN=XRCC1 PE=1 SV=2	8	5	5	5	633	69.4	6.39	10.61	1.02175e+07	1
Q15056	IF4H_HUMAN	Eukaryotic translation initiation factor 4H OS=Homo sapiens OX=9606 GN=EIF4H PE=1 SV=5	18	6	6	6	248	27.4	7.23	13.09	23714184	1
Q9Y2W1	TR150_HUMAN	Thyroid hormone receptor-associated protein 3 OS=Homo sapiens OX=9606 GN=THRAP3 PE=1 SV=2	4	3	3	3	955	108.6	10.15	8.39	2.26497e+06	1
Q13613	MTMR1_HUMAN	Myotubularin-related protein 1 OS=Homo sapiens OX=9606 GN=MTMR1 PE=1 SV=4	6	4	4	4	665	74.6	7.14	4.9	1.68051e+06	1
P0DMV9	HS71B_HUMAN	Heat shock 70 kDa protein 1B OS=Homo sapiens OX=9606 GN=HSPA1B PE=1 SV=1	5	3	3	1	641	70	5.66	5.3	164445	1
P25311	ZA2G_HUMAN	Zinc-alpha-2-glycoprotein OS=Homo sapiens OX=9606 GN=AZGP1 PE=1 SV=2	13	3	3	3	298	34.2	6.05	6.08	4.30838e+06	1
Q96KC8	DNJC1_HUMAN	DnaJ homolog subfamily C member 1 OS=Homo sapiens OX=9606 GN=DNAJC1 PE=1 SV=1	8	4	4	4	554	63.8	8.63	4.13	1.17464e+06	1
Q15366	PCBP2_HUMAN	Poly(rC)-binding protein 2 OS=Homo sapiens OX=9606 GN=PCBP2 PE=1 SV=1	11	3	3	1	365	38.6	6.79	6.87		1
P00367	DHE3_HUMAN	Glutamate dehydrogenase 1, mitochondrial OS=Homo sapiens OX=9606 GN=GLUD1 PE=1 SV=2	8	4	4	4	558	61.4	7.8	9.02	532499	1
P11137	MTAP2_HUMAN	Microtubule-associated protein 2 OS=Homo sapiens OX=9606 GN=MAP2 PE=1 SV=4	2	3	3	3	1827	199.4	4.91	6.82	2.06351e+06	1
Q06265	EXOS9_HUMAN	Exosome complex component RRP45 OS=Homo sapiens OX=9606 GN=EXOSC9 PE=1 SV=3	9	3	3	3	439	48.9	5.29	8.07	2.13613e+06	1
Q9UI10	EI2BD_HUMAN	Translation initiation factor eIF-2B subunit delta OS=Homo sapiens OX=9606 GN=EIF2B4 PE=1 SV=2	7	3	3	3	523	57.5	9.38	7.31	2.35068e+06	1
O43251	RFOX2_HUMAN	RNA binding protein fox-1 homolog 2 OS=Homo sapiens OX=9606 GN=RBFOX2 PE=1 SV=3	12	4	4	4	390	41.3	7.27	7.47	253917	1
P81605	DCD_HUMAN	Dermcidin OS=Homo sapiens OX=9606 GN=DCD PE=1 SV=2	35	3	3	3	110	11.3	6.54	6.24	2.26993e+07	1
O00139	KIF2A_HUMAN	Kinesin-like protein KIF2A OS=Homo sapiens OX=9606 GN=KIF2A PE=1 SV=3	5	4	4	3	706	79.9	6.68	6.05	2.06843e+06	1
Q13263	TIF1B_HUMAN	Transcription intermediary factor 1-beta OS=Homo sapiens OX=9606 GN=TRIM28 PE=1 SV=5	6	4	4	4	835	88.5	5.77	2.03	2.79962e+06	1
P48634	PRC2A_HUMAN	Protein PRRC2A OS=Homo sapiens OX=9606 GN=PRRC2A PE=1 SV=3	2	2	2	2	2157	228.7	9.45	5.57	2.93782e+06	1
P35579	MYH9_HUMAN	Myosin-9 OS=Homo sapiens OX=9606 GN=MYH9 PE=1 SV=4	3	4	4	4	1960	226.4	5.6	2.52	510536	1
Q6PJG2	EMSA1_HUMAN	ELM2 and SANT domain-containing protein 1 OS=Homo sapiens OX=9606 GN=ELMSAN1 PE=1 SV=2	2	1	2	1	1045	114.9	9.19	3.62		1
Q8NFW8	NEUA_HUMAN	N-acylneuraminate cytidylyltransferase OS=Homo sapiens OX=9606 GN=CMAS PE=1 SV=2	7	3	3	3	434	48.3	7.93	7.01	1.67048e+06	1
Q9NR30	DDX21_HUMAN	Nucleolar RNA helicase 2 OS=Homo sapiens OX=9606 GN=DDX21 PE=1 SV=5	7	5	5	5	783	87.3	9.28	5.37	1.81226e+06	1
Q9P270	SLAI2_HUMAN	SLAIN motif-containing protein 2 OS=Homo sapiens OX=9606 GN=SLAIN2 PE=1 SV=2	5	2	2	2	581	62.5	9.45	5.97	2333455	1
Q9Y2R4	DDX52_HUMAN	Probable ATP-dependent RNA helicase DDX52 OS=Homo sapiens OX=9606 GN=DDX52 PE=1 SV=3	6	3	3	3	599	67.5	9.67	6.79	853345	1
Q8NF37	PCAT1_HUMAN	Lysophosphatidylcholine acyltransferase 1 OS=Homo sapiens OX=9606 GN=LPCAT1 PE=1 SV=2	6	3	3	3	534	59.1	6.02	7	1.70852e+06	1
P30260	CDC27_HUMAN	Cell division cycle protein 27 homolog OS=Homo sapiens OX=9606 GN=CDC27 PE=1 SV=2	4	4	4	4	824	91.8	7.02	3.59	2.04877e+06	1
P48643	TCPE_HUMAN	T-complex protein 1 subunit epsilon OS=Homo sapiens OX=9606 GN=CCT5 PE=1 SV=1	5	3	3	3	541	59.6	5.66	6.77	4.68158e+06	1
P43243	MATR3_HUMAN	Matrin-3 OS=Homo sapiens OX=9606 GN=MATR3 PE=1 SV=2	4	3	3	3	847	94.6	6.25	7.51	1.53644e+06	1
Q16629	SRSF7_HUMAN	Serine/arginine-rich splicing factor 7 OS=Homo sapiens OX=9606 GN=SRSF7 PE=1 SV=1	12	3	3	2	238	27.4	11.82	7.43	1.10549e+06	1
P20592	MX2_HUMAN	Interferon-induced GTP-binding protein Mx2 OS=Homo sapiens OX=9606 GN=MX2 PE=1 SV=1	5	3	3	3	715	82	8.76	4.1	246664	1
Q01130	SRSF2_HUMAN	Serine/arginine-rich splicing factor 2 OS=Homo sapiens OX=9606 GN=SRSF2 PE=1 SV=4	9	2	3	2	221	25.5	11.85	2.77	2.45564e+06	1
Q6NZI2	CAVN1_HUMAN	Caveolae-associated protein 1 OS=Homo sapiens OX=9606 GN=CAVIN1 PE=1 SV=1	5	1	1	1	390	43.5	5.6	4.48		1
O43818	U3IP2_HUMAN	U3 small nucleolar RNA-interacting protein 2 OS=Homo sapiens OX=9606 GN=RRP9 PE=1 SV=1	8	4	4	4	475	51.8	7.85	6.72	1.52664e+06	1
Q96QV1	HHIP_HUMAN	Hedgehog-interacting protein OS=Homo sapiens OX=9606 GN=HHIP PE=1 SV=3	5	3	3	3	700	78.8	7.9	4.6	2.05957e+06	1
P55209	NP1L1_HUMAN	Nucleosome assembly protein 1-like 1 OS=Homo sapiens OX=9606 GN=NAP1L1 PE=1 SV=1	7	2	2	2	391	45.3	4.46	2.86	774010	1
Q9Y4F5	C170B_HUMAN	Centrosomal protein of 170 kDa protein B OS=Homo sapiens OX=9606 GN=CEP170B PE=1 SV=4	2	2	2	2	1589	171.6	6.84	4.47		1
O43663	PRC1_HUMAN	Protein regulator of cytokinesis 1 OS=Homo sapiens OX=9606 GN=PRC1 PE=1 SV=2	4	2	2	2	620	71.6	6.68	4.92	489352	1
O75396	SC22B_HUMAN	Vesicle-trafficking protein SEC22b OS=Homo sapiens OX=9606 GN=SEC22B PE=1 SV=4	11	2	2	2	215	24.6	6.92	4.93		1
Q5JVS0	HABP4_HUMAN	Intracellular hyaluronan-binding protein 4 OS=Homo sapiens OX=9606 GN=HABP4 PE=1 SV=1	6	2	2	2	413	45.8	7.46	5.02	659067	1
P53350	PLK1_HUMAN	Serine/threonine-protein kinase PLK1 OS=Homo sapiens OX=9606 GN=PLK1 PE=1 SV=1	6	3	3	3	603	68.2	8.91	4.52	923928	1
P28288	ABCD3_HUMAN	ATP-binding cassette sub-family D member 3 OS=Homo sapiens OX=9606 GN=ABCD3 PE=1 SV=1	7	5	5	5	659	75.4	9.36	4.05	2.90074e+06	1
P49916	DNLI3_HUMAN	DNA ligase 3 OS=Homo sapiens OX=9606 GN=LIG3 PE=1 SV=2	3	3	4	3	1009	112.8	9.01	5.73	114214	1
Q08AF3	SLFN5_HUMAN	Schlafen family member 5 OS=Homo sapiens OX=9606 GN=SLFN5 PE=1 SV=1	2	2	3	2	891	101	8.22	2.32	266926	1
Q96NY9	MUS81_HUMAN	Crossover junction endonuclease MUS81 OS=Homo sapiens OX=9606 GN=MUS81 PE=1 SV=3	5	2	2	2	551	61.1	9.73	3.59	541896	1
Q9Y6R0	NUMBL_HUMAN	Numb-like protein OS=Homo sapiens OX=9606 GN=NUMBL PE=1 SV=1	5	3	3	1	609	64.9	8.85	4.57	337679	1
P85037	FOXK1_HUMAN	Forkhead box protein K1 OS=Homo sapiens OX=9606 GN=FOXK1 PE=1 SV=1	4	3	3	3	733	75.4	9.32	5.98	2.5301e+06	1
P26572	MGAT1_HUMAN	Alpha-1,3-mannosyl-glycoprotein 2-beta-N-acetylglucosaminyltransferase OS=Homo sapiens OX=9606 GN=MGAT1 PE=1 SV=2	5	2	2	2	445	50.8	9.16	4.81	373730	1
Q9P035	HACD3_HUMAN	Very-long-chain (3R)-3-hydroxyacyl-CoA dehydratase 3 OS=Homo sapiens OX=9606 GN=HACD3 PE=1 SV=2	6	2	2	2	362	43.1	8.94	5.44	2.47375e+06	1
Q9BPZ7	SIN1_HUMAN	Target of rapamycin complex 2 subunit MAPKAP1 OS=Homo sapiens OX=9606 GN=MAPKAP1 PE=1 SV=2	5	2	2	2	522	59.1	7.55	4.61	407987	1
P29728	OAS2_HUMAN	2'-5'-oligoadenylate synthase 2 OS=Homo sapiens OX=9606 GN=OAS2 PE=1 SV=3	5	4	4	4	719	82.4	8.25	6.43	1.75976e+06	1
Q8WX92	NELFB_HUMAN	Negative elongation factor B OS=Homo sapiens OX=9606 GN=NELFB PE=1 SV=1	7	3	3	3	580	65.7	6.13	4.65	2.3423e+06	1
P83731	RL24_HUMAN	60S ribosomal protein L24 OS=Homo sapiens OX=9606 GN=RPL24 PE=1 SV=1	14	2	2	2	157	17.8	11.25	4.8	521729	1
Q13151	ROA0_HUMAN	Heterogeneous nuclear ribonucleoprotein A0 OS=Homo sapiens OX=9606 GN=HNRNPA0 PE=1 SV=1	9	2	2	2	305	30.8	9.29	3.68	1.86756e+06	1
Q99700	ATX2_HUMAN	Ataxin-2 OS=Homo sapiens OX=9606 GN=ATXN2 PE=1 SV=2	4	3	3	3	1313	140.2	9.57	5.45	1.5225e+06	1
Q9P2N5	RBM27_HUMAN	RNA-binding protein 27 OS=Homo sapiens OX=9606 GN=RBM27 PE=1 SV=2	2	2	2	1	1060	118.6	9.19	5.8	3401952	1
O60678	ANM3_HUMAN	Protein arginine N-methyltransferase 3 OS=Homo sapiens OX=9606 GN=PRMT3 PE=1 SV=4	7	3	3	3	531	59.9	5.35	2.94	1.07632e+06	1
Q2TAY7	SMU1_HUMAN	WD40 repeat-containing protein SMU1 OS=Homo sapiens OX=9606 GN=SMU1 PE=1 SV=2	4	2	2	2	513	57.5	7.18	4.62	186590	1
Q96F86	EDC3_HUMAN	Enhancer of mRNA-decapping protein 3 OS=Homo sapiens OX=9606 GN=EDC3 PE=1 SV=1	6	3	3	3	508	56	7.11	6.68	4.71577e+06	1
P78347	GTF2I_HUMAN	General transcription factor II-I OS=Homo sapiens OX=9606 GN=GTF2I PE=1 SV=2	4	3	3	3	998	112.3	6.39	4.8	691200	1
P07237	PDIA1_HUMAN	Protein disulfide-isomerase OS=Homo sapiens OX=9606 GN=P4HB PE=1 SV=3	6	4	4	4	508	57.1	4.87	1.64	643857	1
Q32P44	EMAL3_HUMAN	Echinoderm microtubule-associated protein-like 3 OS=Homo sapiens OX=9606 GN=EML3 PE=1 SV=1	3	2	2	2	896	95.1	7.12	3.66	1.06785e+06	1
O75427	LRCH4_HUMAN	Leucine-rich repeat and calponin homology domain-containing protein 4 OS=Homo sapiens OX=9606 GN=LRCH4 PE=1 SV=2	5	2	2	2	683	73.4	8.22	2.33	83688.9	1
Q15637	SF01_HUMAN	Splicing factor 1 OS=Homo sapiens OX=9606 GN=SF1 PE=1 SV=4	4	2	2	2	639	68.3	8.98	5.69	2.69257e+06	1
Q9Y4P3	TBL2_HUMAN	Transducin beta-like protein 2 OS=Homo sapiens OX=9606 GN=TBL2 PE=1 SV=1	6	2	2	2	447	49.8	9.44	4.4	807660	1
Q9UJV9	DDX41_HUMAN	Probable ATP-dependent RNA helicase DDX41 OS=Homo sapiens OX=9606 GN=DDX41 PE=1 SV=2	6	4	4	4	622	69.8	6.84	2.11	477979	1
P07996	TSP1_HUMAN	Thrombospondin-1 OS=Homo sapiens OX=9606 GN=THBS1 PE=1 SV=2	2	2	2	2	1170	129.3	4.94	2.74	48437.8	1
P26373	RL13_HUMAN	60S ribosomal protein L13 OS=Homo sapiens OX=9606 GN=RPL13 PE=1 SV=4	10	2	2	2	211	24.2	11.65	5.09	699665	1
P47914	RL29_HUMAN	60S ribosomal protein L29 OS=Homo sapiens OX=9606 GN=RPL29 PE=1 SV=2	14	2	2	2	159	17.7	11.66	3.66	5.09379e+06	1
Q8WY22	BRI3B_HUMAN	BRI3-binding protein OS=Homo sapiens OX=9606 GN=BRI3BP PE=1 SV=1	14	2	2	2	251	27.8	9.44	2.24	595807	1
Q9UPN3	MACF1_HUMAN	Microtubule-actin cross-linking factor 1, isoforms 1/2/3/5 OS=Homo sapiens OX=9606 GN=MACF1 PE=1 SV=4	0	2	2	2	7388	837.8	5.39	4.27		1
Q8IYM9	TRI22_HUMAN	E3 ubiquitin-protein ligase TRIM22 OS=Homo sapiens OX=9606 GN=TRIM22 PE=1 SV=1	5	2	2	2	498	56.9	7.72	2.27	874712	1
P29083	T2EA_HUMAN	General transcription factor IIE subunit 1 OS=Homo sapiens OX=9606 GN=GTF2E1 PE=1 SV=2	7	2	2	2	439	49.4	4.82	4.53		1
O15091	MRPP3_HUMAN	Mitochondrial ribonuclease P catalytic subunit OS=Homo sapiens OX=9606 GN=KIAA0391 PE=1 SV=2	5	4	4	4	583	67.3	8.78	3.8	2.64668e+06	1
Q16576	RBBP7_HUMAN	Histone-binding protein RBBP7 OS=Homo sapiens OX=9606 GN=RBBP7 PE=1 SV=1	5	2	2	2	425	47.8	5.05	2.52	532802	1
Q69YN2	C19L1_HUMAN	CWF19-like protein 1 OS=Homo sapiens OX=9606 GN=CWF19L1 PE=1 SV=2	3	1	1	1	538	60.6	7.24	3.68		1
Q96A33	CCD47_HUMAN	Coiled-coil domain-containing protein 47 OS=Homo sapiens OX=9606 GN=CCDC47 PE=1 SV=1	4	2	2	2	483	55.8	4.87	4.57	472747	1
P04792	HSPB1_HUMAN	Heat shock protein beta-1 OS=Homo sapiens OX=9606 GN=HSPB1 PE=1 SV=2	13	2	2	2	205	22.8	6.4	2.94	539312	1
O00505	IMA4_HUMAN	Importin subunit alpha-4 OS=Homo sapiens OX=9606 GN=KPNA3 PE=1 SV=2	5	2	2	2	521	57.8	4.94	2.46	354344	1
Q9NW64	RBM22_HUMAN	Pre-mRNA-splicing factor RBM22 OS=Homo sapiens OX=9606 GN=RBM22 PE=1 SV=1	9	2	2	2	420	46.9	8.54	1.8	1.40886e+06	1
Q5JTV8	TOIP1_HUMAN	Torsin-1A-interacting protein 1 OS=Homo sapiens OX=9606 GN=TOR1AIP1 PE=1 SV=2	4	2	2	2	583	66.2	8.18	2.7	1.14007e+06	1
Q8NBS9	TXND5_HUMAN	Thioredoxin domain-containing protein 5 OS=Homo sapiens OX=9606 GN=TXNDC5 PE=1 SV=2	8	4	4	4	432	47.6	5.97	2.08	1.42805e+06	1
Q9NPI6	DCP1A_HUMAN	mRNA-decapping enzyme 1A OS=Homo sapiens OX=9606 GN=DCP1A PE=1 SV=3	8	2	2	2	582	63.2	6.25	4.54		1
P41214	EIF2D_HUMAN	Eukaryotic translation initiation factor 2D OS=Homo sapiens OX=9606 GN=EIF2D PE=1 SV=3	4	2	2	2	584	64.7	7.65	4.41	395944	1
Q9NZ01	TECR_HUMAN	Very-long-chain enoyl-CoA reductase OS=Homo sapiens OX=9606 GN=TECR PE=1 SV=1	9	3	3	3	308	36	9.45	3.97	9.38581e+06	1
Q9BYC5	FUT8_HUMAN	Alpha-(1,6)-fucosyltransferase OS=Homo sapiens OX=9606 GN=FUT8 PE=1 SV=2	2	1	1	1	575	66.5	7.66	3.43	655754	1
P05109	S10A8_HUMAN	Protein S100-A8 OS=Homo sapiens OX=9606 GN=S100A8 PE=1 SV=1	20	2	2	2	93	10.8	7.03	2.82	624523	1
P40227	TCPZ_HUMAN	T-complex protein 1 subunit zeta OS=Homo sapiens OX=9606 GN=CCT6A PE=1 SV=3	5	3	3	3	531	58	6.68	3.52	589770	1
Q86U42	PABP2_HUMAN	Polyadenylate-binding protein 2 OS=Homo sapiens OX=9606 GN=PABPN1 PE=1 SV=3	6	2	2	2	306	32.7	5.06	3.21	984274	1
P31025	LCN1_HUMAN	Lipocalin-1 OS=Homo sapiens OX=9606 GN=LCN1 PE=1 SV=1	11	2	2	2	176	19.2	5.58	4.68	1440691	1
O75122	CLAP2_HUMAN	CLIP-associating protein 2 OS=Homo sapiens OX=9606 GN=CLASP2 PE=1 SV=3	1	1	1	1	1294	141	8.4	2.99		1
O95365	ZBT7A_HUMAN	Zinc finger and BTB domain-containing protein 7A OS=Homo sapiens OX=9606 GN=ZBTB7A PE=1 SV=1	3	1	1	1	584	61.4	5.19	2.73		1
P10155	RO60_HUMAN	60 kDa SS-A/Ro ribonucleoprotein OS=Homo sapiens OX=9606 GN=RO60 PE=1 SV=2	4	2	2	2	538	60.6	8.03	4.91	524307	1
Q12797	ASPH_HUMAN	Aspartyl/asparaginyl beta-hydroxylase OS=Homo sapiens OX=9606 GN=ASPH PE=1 SV=3	4	2	2	2	758	85.8	5.01	2.51	245582	1
Q14103	HNRPD_HUMAN	Heterogeneous nuclear ribonucleoprotein D0 OS=Homo sapiens OX=9606 GN=HNRNPD PE=1 SV=1	6	2	2	2	355	38.4	7.81	4.77	1.88353e+06	1
O15123	ANGP2_HUMAN	Angiopoietin-2 OS=Homo sapiens OX=9606 GN=ANGPT2 PE=1 SV=1	5	2	2	2	496	56.9	5.58	4.33	1.11838e+06	1
O15269	SPTC1_HUMAN	Serine palmitoyltransferase 1 OS=Homo sapiens OX=9606 GN=SPTLC1 PE=1 SV=1	4	2	2	2	473	52.7	6.01	2.4	851695	1
Q14152	EIF3A_HUMAN	Eukaryotic translation initiation factor 3 subunit A OS=Homo sapiens OX=9606 GN=EIF3A PE=1 SV=1	2	2	2	2	1382	166.5	6.79	2.68	187362	1
Q969G3	SMCE1_HUMAN	SWI/SNF-related matrix-associated actin-dependent regulator of chromatin subfamily E member 1 OS=Homo sapiens OX=9606 GN=SMARCE1 PE=1 SV=2	4	1	1	1	411	46.6	4.88	2.77		1
Q9NVN8	GNL3L_HUMAN	Guanine nucleotide-binding protein-like 3-like protein OS=Homo sapiens OX=9606 GN=GNL3L PE=1 SV=1	5	3	3	3	582	65.5	8.44	5.29	7.2743e+06	1
Q99729	ROAA_HUMAN	Heterogeneous nuclear ribonucleoprotein A/B OS=Homo sapiens OX=9606 GN=HNRNPAB PE=1 SV=2	6	2	2	2	332	36.2	8.21	1.99	190667	1
P15924	DESP_HUMAN	Desmoplakin OS=Homo sapiens OX=9606 GN=DSP PE=1 SV=3	1	2	2	2	2871	331.6	6.81	3.62	376770	1
Q10471	GALT2_HUMAN	Polypeptide N-acetylgalactosaminyltransferase 2 OS=Homo sapiens OX=9606 GN=GALNT2 PE=1 SV=1	4	2	2	2	571	64.7	8.35	3.57	1.13321e+06	1
P56192	SYMC_HUMAN	Methionine--tRNA ligase, cytoplasmic OS=Homo sapiens OX=9606 GN=MARS PE=1 SV=2	2	2	2	2	900	101.1	6.16	2.9	176781	1
Q8WWK9	CKAP2_HUMAN	Cytoskeleton-associated protein 2 OS=Homo sapiens OX=9606 GN=CKAP2 PE=1 SV=1	4	2	2	2	683	76.9	9.41	2.04		1
O95400	CD2B2_HUMAN	CD2 antigen cytoplasmic tail-binding protein 2 OS=Homo sapiens OX=9606 GN=CD2BP2 PE=1 SV=1	3	1	1	1	341	37.6	4.61	3.51	448855	1
Q9H6I2	SOX17_HUMAN	Transcription factor SOX-17 OS=Homo sapiens OX=9606 GN=SOX17 PE=1 SV=1	6	1	1	1	414	44.1	6.48	3.71	212423	1
Q70UQ0	IKIP_HUMAN	Inhibitor of nuclear factor kappa-B kinase-interacting protein OS=Homo sapiens OX=9606 GN=IKBIP PE=1 SV=1	5	2	2	2	350	39.3	9.17	5.66	3.94521e+06	1
Q9NUQ8	ABCF3_HUMAN	ATP-binding cassette sub-family F member 3 OS=Homo sapiens OX=9606 GN=ABCF3 PE=1 SV=2	3	2	2	2	709	79.7	6.34	1.65		1
Q9NYF8	BCLF1_HUMAN	Bcl-2-associated transcription factor 1 OS=Homo sapiens OX=9606 GN=BCLAF1 PE=1 SV=2	2	2	2	2	920	106.1	9.98	4.36	1.80743e+06	1
Q13148	TADBP_HUMAN	TAR DNA-binding protein 43 OS=Homo sapiens OX=9606 GN=TARDBP PE=1 SV=1	4	1	1	1	414	44.7	6.19	2.05		1
Q9UBS0	KS6B2_HUMAN	Ribosomal protein S6 kinase beta-2 OS=Homo sapiens OX=9606 GN=RPS6KB2 PE=1 SV=2	3	1	1	1	482	53.4	7.34	3.05	924201	1
Q7RTS7	K2C74_HUMAN	Keratin, type II cytoskeletal 74 OS=Homo sapiens OX=9606 GN=KRT74 PE=1 SV=2	4	3	3	1	529	57.8	7.71	6.26	900176	1
P62277	RS13_HUMAN	40S ribosomal protein S13 OS=Homo sapiens OX=9606 GN=RPS13 PE=1 SV=2	11	2	2	2	151	17.2	10.54	4.12	375166	1
Q9Y5X2	SNX8_HUMAN	Sorting nexin-8 OS=Homo sapiens OX=9606 GN=SNX8 PE=1 SV=1	4	2	2	2	465	52.5	7.39	3.59	28856.8	1
P02748	CO9_HUMAN	Complement component C9 OS=Homo sapiens OX=9606 GN=C9 PE=1 SV=2	2	1	1	1	559	63.1	5.59	2.54	318488	1
P17066	HSP76_HUMAN	Heat shock 70 kDa protein 6 OS=Homo sapiens OX=9606 GN=HSPA6 PE=1 SV=2	3	2	2	0	643	71	6.14	2.08		1
O43148	MCES_HUMAN	mRNA cap guanine-N7 methyltransferase OS=Homo sapiens OX=9606 GN=RNMT PE=1 SV=1	7	3	3	3	476	54.8	6.61	3.54	1.7486e+06	1
O60762	DPM1_HUMAN	Dolichol-phosphate mannosyltransferase subunit 1 OS=Homo sapiens OX=9606 GN=DPM1 PE=1 SV=1	4	1	1	1	260	29.6	9.57	2.92	301569	1
O15260	SURF4_HUMAN	Surfeit locus protein 4 OS=Homo sapiens OX=9606 GN=SURF4 PE=1 SV=3	7	2	2	2	269	30.4	7.78	4.26	679394	1
P29558	RBMS1_HUMAN	RNA-binding motif, single-stranded-interacting protein 1 OS=Homo sapiens OX=9606 GN=RBMS1 PE=1 SV=3	4	1	1	1	406	44.5	8.79	3.52	706401	1
P14923	PLAK_HUMAN	Junction plakoglobin OS=Homo sapiens OX=9606 GN=JUP PE=1 SV=3	3	3	3	3	745	81.7	6.14	5.36	701305	1
P49757	NUMB_HUMAN	Protein numb homolog OS=Homo sapiens OX=9606 GN=NUMB PE=1 SV=2	4	3	3	1	651	70.8	8.51	3.47	1.94183e+06	1
Q9NPD3	EXOS4_HUMAN	Exosome complex component RRP41 OS=Homo sapiens OX=9606 GN=EXOSC4 PE=1 SV=3	9	2	2	2	245	26.4	6.52	1.71	1.17043e+06	1
P54727	RD23B_HUMAN	UV excision repair protein RAD23 homolog B OS=Homo sapiens OX=9606 GN=RAD23B PE=1 SV=1	6	3	3	3	409	43.1	4.84	4.06	2.50017e+06	1
P18124	RL7_HUMAN	60S ribosomal protein L7 OS=Homo sapiens OX=9606 GN=RPL7 PE=1 SV=1	4	1	1	1	248	29.2	10.65	2.85	284019	1
Q99958	FOXC2_HUMAN	Forkhead box protein C2 OS=Homo sapiens OX=9606 GN=FOXC2 PE=1 SV=1	3	1	1	1	501	53.7	8.5	2.85	277242	1
Q8TDB6	DTX3L_HUMAN	E3 ubiquitin-protein ligase DTX3L OS=Homo sapiens OX=9606 GN=DTX3L PE=1 SV=1	2	1	1	1	740	83.5	8.06	2.12		1
Q14247	SRC8_HUMAN	Src substrate cortactin OS=Homo sapiens OX=9606 GN=CTTN PE=1 SV=2	5	3	3	3	550	61.5	5.4	1.88	1.0868e+06	1
Q13614	MTMR2_HUMAN	Myotubularin-related protein 2 OS=Homo sapiens OX=9606 GN=MTMR2 PE=1 SV=4	1	1	1	1	643	73.3	7.4	2.02	132050	1
O60832	DKC1_HUMAN	H/ACA ribonucleoprotein complex subunit DKC1 OS=Homo sapiens OX=9606 GN=DKC1 PE=1 SV=3	4	2	2	2	514	57.6	9.42	2.32	1.7922e+06	1
O43491	E41L2_HUMAN	Band 4.1-like protein 2 OS=Homo sapiens OX=9606 GN=EPB41L2 PE=1 SV=1	2	2	2	2	1005	112.5	5.44	2.03	598160	1
Q15051	IQCB1_HUMAN	IQ calmodulin-binding motif-containing protein 1 OS=Homo sapiens OX=9606 GN=IQCB1 PE=1 SV=1	3	2	2	2	598	68.9	9.1	1.85	426202	1
Q9Y613	FHOD1_HUMAN	FH1/FH2 domain-containing protein 1 OS=Homo sapiens OX=9606 GN=FHOD1 PE=1 SV=3	2	2	2	2	1164	126.5	6.39	2.25	43967.7	1
Q9UQ13	SHOC2_HUMAN	Leucine-rich repeat protein SHOC-2 OS=Homo sapiens OX=9606 GN=SHOC2 PE=1 SV=2	2	1	1	1	582	64.8	8.46	3.25	492666	1
Q9Y2W6	TDRKH_HUMAN	Tudor and KH domain-containing protein OS=Homo sapiens OX=9606 GN=TDRKH PE=1 SV=2	6	2	2	2	561	62	5.02	1.81	261081	1
Q8N5G2	MACOI_HUMAN	Macoilin OS=Homo sapiens OX=9606 GN=MACO1 PE=1 SV=1	3	2	2	2	664	76.1	9.07	3.94	1.05665e+06	1
Q9H1I8	ASCC2_HUMAN	Activating signal cointegrator 1 complex subunit 2 OS=Homo sapiens OX=9606 GN=ASCC2 PE=1 SV=3	2	2	2	2	757	86.3	5.16	2.03	1.02924e+06	1
Q9H2D6	TARA_HUMAN	TRIO and F-actin-binding protein OS=Homo sapiens OX=9606 GN=TRIOBP PE=1 SV=3	1	2	2	2	2365	261.2	8.48	2.13	329484	1
Q9Y520	PRC2C_HUMAN	Protein PRRC2C OS=Homo sapiens OX=9606 GN=PRRC2C PE=1 SV=4	1	3	3	3	2896	316.7	9.13	2.71	1.59445e+06	1
Q9UNY4	TTF2_HUMAN	Transcription termination factor 2 OS=Homo sapiens OX=9606 GN=TTF2 PE=1 SV=2	2	2	2	2	1162	129.5	8.37	1.63	319503	1
Q15428	SF3A2_HUMAN	Splicing factor 3A subunit 2 OS=Homo sapiens OX=9606 GN=SF3A2 PE=1 SV=2	3	2	2	2	464	49.2	9.64	2.04	1.44566e+06	1
Q9UK59	DBR1_HUMAN	Lariat debranching enzyme OS=Homo sapiens OX=9606 GN=DBR1 PE=1 SV=2	2	1	1	1	544	61.5	5.47	2.67	456627	1
P53814	SMTN_HUMAN	Smoothelin OS=Homo sapiens OX=9606 GN=SMTN PE=1 SV=7	2	2	2	2	917	99	9.07	3.53	765922	1
Q96EP5	DAZP1_HUMAN	DAZ-associated protein 1 OS=Homo sapiens OX=9606 GN=DAZAP1 PE=1 SV=1	6	2	2	2	407	43.4	8.56	2.55	1.40866e+06	1
P57088	TMM33_HUMAN	Transmembrane protein 33 OS=Homo sapiens OX=9606 GN=TMEM33 PE=1 SV=2	5	1	1	1	247	28	9.7	2.5		1
Q9BWE0	REPI1_HUMAN	Replication initiator 1 OS=Homo sapiens OX=9606 GN=REPIN1 PE=1 SV=1	2	1	1	1	567	63.5	9.98	3.02	697116	1
P18754	RCC1_HUMAN	Regulator of chromosome condensation OS=Homo sapiens OX=9606 GN=RCC1 PE=1 SV=1	4	2	2	2	421	44.9	7.52	1.74	592957	1
P09429	HMGB1_HUMAN	High mobility group protein B1 OS=Homo sapiens OX=9606 GN=HMGB1 PE=1 SV=3	7	1	1	1	215	24.9	5.74	2.94	1.50444e+06	1
Q7Z460	CLAP1_HUMAN	CLIP-associating protein 1 OS=Homo sapiens OX=9606 GN=CLASP1 PE=1 SV=1	1	1	1	1	1538	169.3	9.03	2.02		1
Q13322	GRB10_HUMAN	Growth factor receptor-bound protein 10 OS=Homo sapiens OX=9606 GN=GRB10 PE=1 SV=2	3	2	2	2	594	67.2	7.87	2.09	2.45577e+06	1
Q9Y3X0	CCDC9_HUMAN	Coiled-coil domain-containing protein 9 OS=Homo sapiens OX=9606 GN=CCDC9 PE=1 SV=1	2	1	1	1	531	59.7	5.4	2.99	142922	1
P14678	RSMB_HUMAN	Small nuclear ribonucleoprotein-associated proteins B and B' OS=Homo sapiens OX=9606 GN=SNRPB PE=1 SV=2	6	2	2	2	240	24.6	11.19	2.22	466054	1
P61626	LYSC_HUMAN	Lysozyme C OS=Homo sapiens OX=9606 GN=LYZ PE=1 SV=1	15	3	3	3	148	16.5	9.16	6.08	5.14254e+06	1
Q8IY67	RAVR1_HUMAN	Ribonucleoprotein PTB-binding 1 OS=Homo sapiens OX=9606 GN=RAVER1 PE=1 SV=1	2	1	1	1	606	63.8	8.48	2.83	455298	1
O00267	SPT5H_HUMAN	Transcription elongation factor SPT5 OS=Homo sapiens OX=9606 GN=SUPT5H PE=1 SV=1	3	2	2	2	1087	120.9	5.06	3.84	302658	1
Q8IYS2	K2013_HUMAN	Uncharacterized protein KIAA2013 OS=Homo sapiens OX=9606 GN=KIAA2013 PE=1 SV=1	3	2	2	2	634	69.1	8.19	1.84	1.66129e+06	1
Q9H0S4	DDX47_HUMAN	Probable ATP-dependent RNA helicase DDX47 OS=Homo sapiens OX=9606 GN=DDX47 PE=1 SV=1	4	2	2	2	455	50.6	9.1	3.65	1.7488e+06	1
Q13131	AAPK1_HUMAN	5'-AMP-activated protein kinase catalytic subunit alpha-1 OS=Homo sapiens OX=9606 GN=PRKAA1 PE=1 SV=4	2	1	1	1	559	64	8.12	2.48	106846	1
O75382	TRIM3_HUMAN	Tripartite motif-containing protein 3 OS=Homo sapiens OX=9606 GN=TRIM3 PE=1 SV=2	1	1	1	1	744	80.8	7.83	2.26	165685	1
Q9H4H8	FA83D_HUMAN	Protein FAM83D OS=Homo sapiens OX=9606 GN=FAM83D PE=1 SV=3	3	2	2	2	585	64.4	6.54	1.8	218975	1
P12268	IMDH2_HUMAN	Inosine-5'-monophosphate dehydrogenase 2 OS=Homo sapiens OX=9606 GN=IMPDH2 PE=1 SV=2	2	1	1	1	514	55.8	6.9	2.52		1
Q99661	KIF2C_HUMAN	Kinesin-like protein KIF2C OS=Homo sapiens OX=9606 GN=KIF2C PE=1 SV=2	2	2	2	1	725	81.3	7.83	3.66	500386	1
P07355	ANXA2_HUMAN	Annexin A2 OS=Homo sapiens OX=9606 GN=ANXA2 PE=1 SV=2	4	1	1	1	339	38.6	7.75	2.48	70479.7	1
Q5SSJ5	HP1B3_HUMAN	Heterochromatin protein 1-binding protein 3 OS=Homo sapiens OX=9606 GN=HP1BP3 PE=1 SV=1	3	2	2	2	553	61.2	9.67	3.77	1.27807e+06	1
O60507	TPST1_HUMAN	Protein-tyrosine sulfotransferase 1 OS=Homo sapiens OX=9606 GN=TPST1 PE=1 SV=1	3	1	1	1	370	42.2	9.09	2.47	107588	1
Q9UGR2	Z3H7B_HUMAN	Zinc finger CCCH domain-containing protein 7B OS=Homo sapiens OX=9606 GN=ZC3H7B PE=1 SV=2	3	2	2	2	977	109.8	7.25	2.8	434220	1
Q9HC36	MRM3_HUMAN	rRNA methyltransferase 3, mitochondrial OS=Homo sapiens OX=9606 GN=MRM3 PE=1 SV=2	2	1	1	1	420	47	8.73	2.46	249084	1
Q10472	GALT1_HUMAN	Polypeptide N-acetylgalactosaminyltransferase 1 OS=Homo sapiens OX=9606 GN=GALNT1 PE=1 SV=1	3	2	2	2	559	64.2	7.72	4.42	1.49078e+06	1
Q9HD45	TM9S3_HUMAN	Transmembrane 9 superfamily member 3 OS=Homo sapiens OX=9606 GN=TM9SF3 PE=1 SV=2	3	2	2	2	589	67.8	7.21	1.84	1.3772e+06	1
Q15717	ELAV1_HUMAN	ELAV-like protein 1 OS=Homo sapiens OX=9606 GN=ELAVL1 PE=1 SV=2	3	1	1	1	326	36.1	9.17	2.65	1.50479e+06	1
P18031	PTN1_HUMAN	Tyrosine-protein phosphatase non-receptor type 1 OS=Homo sapiens OX=9606 GN=PTPN1 PE=1 SV=1	3	1	1	1	435	49.9	6.27	2.73	247580	1
Q8WVC6	DCAKD_HUMAN	Dephospho-CoA kinase domain-containing protein OS=Homo sapiens OX=9606 GN=DCAKD PE=1 SV=1	5	1	1	1	231	26.5	9.58	3.46	518265	1
Q5JSZ5	PRC2B_HUMAN	Protein PRRC2B OS=Homo sapiens OX=9606 GN=PRRC2B PE=1 SV=2	1	1	1	1	2229	242.8	8.34	2.68		1
O96000	NDUBA_HUMAN	NADH dehydrogenase [ubiquinone] 1 beta subcomplex subunit 10 OS=Homo sapiens OX=9606 GN=NDUFB10 PE=1 SV=3	6	1	1	1	172	20.8	8.48	2.52	617570	1
Q8NAF0	ZN579_HUMAN	Zinc finger protein 579 OS=Homo sapiens OX=9606 GN=ZNF579 PE=1 SV=2	3	1	1	1	562	60.5	8.69	3.08	440848	1
Q9BVC6	TM109_HUMAN	Transmembrane protein 109 OS=Homo sapiens OX=9606 GN=TMEM109 PE=1 SV=1	5	1	1	1	243	26.2	10.48	2.75		1
Q8IWU6	SULF1_HUMAN	Extracellular sulfatase Sulf-1 OS=Homo sapiens OX=9606 GN=SULF1 PE=1 SV=1	1	2	2	2	871	101	9.09	1.83	467011	1
P39060	COIA1_HUMAN	Collagen alpha-1(XVIII) chain OS=Homo sapiens OX=9606 GN=COL18A1 PE=1 SV=5	1	1	1	1	1754	178.1	6.01	2.53		1
Q5TA45	INT11_HUMAN	Integrator complex subunit 11 OS=Homo sapiens OX=9606 GN=INTS11 PE=1 SV=2	3	2	2	2	600	67.6	8.06	2.34	372499	1
A6NFI3	ZN316_HUMAN	Zinc finger protein 316 OS=Homo sapiens OX=9606 GN=ZNF316 PE=1 SV=1	2	1	1	1	1004	108.4	5.31	2.35		1
O43824	GTPB6_HUMAN	Putative GTP-binding protein 6 OS=Homo sapiens OX=9606 GN=GTPBP6 PE=2 SV=4	4	2	2	2	516	56.9	9.42	0	686486	1
Q8TBC3	SHKB1_HUMAN	SH3KBP1-binding protein 1 OS=Homo sapiens OX=9606 GN=SHKBP1 PE=1 SV=2	2	1	1	1	707	76.3	8.28	2.16	207814	1
Q96CW1	AP2M1_HUMAN	AP-2 complex subunit mu OS=Homo sapiens OX=9606 GN=AP2M1 PE=1 SV=2	4	2	2	2	435	49.6	9.54	3.46		1
O60488	ACSL4_HUMAN	Long-chain-fatty-acid--CoA ligase 4 OS=Homo sapiens OX=9606 GN=ACSL4 PE=1 SV=2	3	2	2	2	711	79.1	8.38	1.82	140543	1
Q7Z6J2	GRASP_HUMAN	General receptor for phosphoinositides 1-associated scaffold protein OS=Homo sapiens OX=9606 GN=GRASP PE=1 SV=1	8	2	2	2	395	42.6	8.84	3.4	1.74714e+06	1
Q9H0G5	NSRP1_HUMAN	Nuclear speckle splicing regulatory protein 1 OS=Homo sapiens OX=9606 GN=NSRP1 PE=1 SV=1	3	2	2	2	558	66.4	8.84	2.23	1.03397e+06	1
Q92989	CLP1_HUMAN	Polyribonucleotide 5'-hydroxyl-kinase Clp1 OS=Homo sapiens OX=9606 GN=CLP1 PE=1 SV=1	4	2	2	2	425	47.6	6.62	2.12	339361	1
Q08AD1	CAMP2_HUMAN	Calmodulin-regulated spectrin-associated protein 2 OS=Homo sapiens OX=9606 GN=CAMSAP2 PE=1 SV=3	1	1	1	1	1489	168	6.8	2.66	1.37754e+06	1
Q99986	VRK1_HUMAN	Serine/threonine-protein kinase VRK1 OS=Homo sapiens OX=9606 GN=VRK1 PE=1 SV=1	4	1	1	1	396	45.4	8.91	0		1
Q13724	MOGS_HUMAN	Mannosyl-oligosaccharide glucosidase OS=Homo sapiens OX=9606 GN=MOGS PE=1 SV=5	2	2	2	2	837	91.9	8.9	1.69	430101	1
O15258	RER1_HUMAN	Protein RER1 OS=Homo sapiens OX=9606 GN=RER1 PE=1 SV=1	6	1	1	1	196	22.9	9.54	1.77	203181	1
Q9NUW8	TYDP1_HUMAN	Tyrosyl-DNA phosphodiesterase 1 OS=Homo sapiens OX=9606 GN=TDP1 PE=1 SV=2	3	2	2	2	608	68.4	7.65	0	33617.6	1
P84098	RL19_HUMAN	60S ribosomal protein L19 OS=Homo sapiens OX=9606 GN=RPL19 PE=1 SV=1	5	1	1	1	196	23.5	11.47	2.24	1.16462e+06	1
P49761	CLK3_HUMAN	Dual specificity protein kinase CLK3 OS=Homo sapiens OX=9606 GN=CLK3 PE=1 SV=3	1	1	1	1	638	73.5	9.92	2.66	624325	1
P51991	ROA3_HUMAN	Heterogeneous nuclear ribonucleoprotein A3 OS=Homo sapiens OX=9606 GN=HNRNPA3 PE=1 SV=2	3	1	1	1	378	39.6	9.01	2.04	233608	1
Q9H082	RB33B_HUMAN	Ras-related protein Rab-33B OS=Homo sapiens OX=9606 GN=RAB33B PE=1 SV=1	5	1	1	1	229	25.7	7.18	2.31	301301	1
Q14807	KIF22_HUMAN	Kinesin-like protein KIF22 OS=Homo sapiens OX=9606 GN=KIF22 PE=1 SV=5	2	1	1	1	665	73.2	9.45	0	166440	1
Q96S52	PIGS_HUMAN	GPI transamidase component PIG-S OS=Homo sapiens OX=9606 GN=PIGS PE=1 SV=3	3	2	2	2	555	61.6	6.49	1.85	355627	1
Q9NV06	DCA13_HUMAN	DDB1- and CUL4-associated factor 13 OS=Homo sapiens OX=9606 GN=DCAF13 PE=1 SV=2	4	2	2	2	445	51.4	9.19	3.44	2.11539e+06	1
Q12996	CSTF3_HUMAN	Cleavage stimulation factor subunit 3 OS=Homo sapiens OX=9606 GN=CSTF3 PE=1 SV=1	2	1	1	1	717	82.9	8.12	2.51	242665	1
P69905	HBA_HUMAN	Hemoglobin subunit alpha OS=Homo sapiens OX=9606 GN=HBA1 PE=1 SV=2	11	1	1	1	142	15.2	8.68	2.79	872070	1
Q01081	U2AF1_HUMAN	Splicing factor U2AF 35 kDa subunit OS=Homo sapiens OX=9606 GN=U2AF1 PE=1 SV=3	5	1	1	1	240	27.9	8.81	2.76	656991	1
Q6PJI9	WDR59_HUMAN	GATOR complex protein WDR59 OS=Homo sapiens OX=9606 GN=WDR59 PE=1 SV=2	1	1	1	1	974	109.7	7.91	2.25	770606	1
P62917	RL8_HUMAN	60S ribosomal protein L8 OS=Homo sapiens OX=9606 GN=RPL8 PE=1 SV=2	4	1	1	1	257	28	11.03	3.09	2.98688e+06	1
P48681	NEST_HUMAN	Nestin OS=Homo sapiens OX=9606 GN=NES PE=1 SV=2	1	1	1	1	1621	177.3	4.36	1.87	461999	1
Q6P2E9	EDC4_HUMAN	Enhancer of mRNA-decapping protein 4 OS=Homo sapiens OX=9606 GN=EDC4 PE=1 SV=1	2	2	2	2	1401	151.6	5.86	1.83	984435	1
Q9NWK9	BCD1_HUMAN	Box C/D snoRNA protein 1 OS=Homo sapiens OX=9606 GN=ZNHIT6 PE=1 SV=1	3	2	2	2	470	53.9	5.8	3.45	1.45475e+06	1
P61158	ARP3_HUMAN	Actin-related protein 3 OS=Homo sapiens OX=9606 GN=ACTR3 PE=1 SV=3	4	2	2	2	418	47.3	5.88	1.63	266712	1
O94826	TOM70_HUMAN	Mitochondrial import receptor subunit TOM70 OS=Homo sapiens OX=9606 GN=TOMM70 PE=1 SV=1	2	1	1	1	608	67.4	7.12	1.8	174463	1
O43731	ERD23_HUMAN	ER lumen protein-retaining receptor 3 OS=Homo sapiens OX=9606 GN=KDELR3 PE=2 SV=1	4	1	1	1	214	25	8.94	1.71	173709	1
O75529	TAF5L_HUMAN	TAF5-like RNA polymerase II p300/CBP-associated factor-associated factor 65 kDa subunit 5L OS=Homo sapiens OX=9606 GN=TAF5L PE=1 SV=1	2	1	1	1	589	66.1	5.88	2.62	969060	1
P78386	KRT85_HUMAN	Keratin, type II cuticular Hb5 OS=Homo sapiens OX=9606 GN=KRT85 PE=1 SV=1	2	1	1	1	507	55.8	6.55	2.77	750464	1
O95819	M4K4_HUMAN	Mitogen-activated protein kinase kinase kinase kinase 4 OS=Homo sapiens OX=9606 GN=MAP4K4 PE=1 SV=2	1	1	1	1	1239	142	7.46	0	378766	1
P08621	RU17_HUMAN	U1 small nuclear ribonucleoprotein 70 kDa OS=Homo sapiens OX=9606 GN=SNRNP70 PE=1 SV=2	3	1	1	1	437	51.5	9.94	2.6	478900	1
P31151	S10A7_HUMAN	Protein S100-A7 OS=Homo sapiens OX=9606 GN=S100A7 PE=1 SV=4	12	1	1	1	101	11.5	6.77	1.7		1
Q8TEQ6	GEMI5_HUMAN	Gem-associated protein 5 OS=Homo sapiens OX=9606 GN=GEMIN5 PE=1 SV=3	1	1	1	1	1508	168.5	6.62	0	55025.5	1
P16402	H13_HUMAN	Histone H1.3 OS=Homo sapiens OX=9606 GN=HIST1H1D PE=1 SV=2	5	1	1	1	221	22.3	11.02	2.86		1
Q9HCD5	NCOA5_HUMAN	Nuclear receptor coactivator 5 OS=Homo sapiens OX=9606 GN=NCOA5 PE=1 SV=2	2	1	1	1	579	65.5	9.6	1.75		1
Q00587	BORG5_HUMAN	Cdc42 effector protein 1 OS=Homo sapiens OX=9606 GN=CDC42EP1 PE=1 SV=1	2	1	1	1	391	40.3	7.15	2.58	728092	1
Q5JSH3	WDR44_HUMAN	WD repeat-containing protein 44 OS=Homo sapiens OX=9606 GN=WDR44 PE=1 SV=1	1	1	1	1	913	101.3	5.45	2.01	342445	1
Q9UHD8	SEPT9_HUMAN	Septin-9 OS=Homo sapiens OX=9606 GN=SEPT9 PE=1 SV=2	2	1	1	1	586	65.4	8.97	2.12	409275	1
P62241	RS8_HUMAN	40S ribosomal protein S8 OS=Homo sapiens OX=9606 GN=RPS8 PE=1 SV=2	4	1	1	1	208	24.2	10.32	2.38	2707443	1
P59665	DEF1_HUMAN	Neutrophil defensin 1 OS=Homo sapiens OX=9606 GN=DEFA1 PE=1 SV=1	10	1	1	1	94	10.2	6.99	2.36	1.619e+06	1
Q07955	SRSF1_HUMAN	Serine/arginine-rich splicing factor 1 OS=Homo sapiens OX=9606 GN=SRSF1 PE=1 SV=2	4	1	1	1	248	27.7	10.36	1.91	338406	1
O00712	NFIB_HUMAN	Nuclear factor 1 B-type OS=Homo sapiens OX=9606 GN=NFIB PE=1 SV=2	3	1	1	1	420	47.4	8.87	1.67	155640	1
Q12894	IFRD2_HUMAN	Interferon-related developmental regulator 2 OS=Homo sapiens OX=9606 GN=IFRD2 PE=1 SV=3	2	1	1	1	506	54.8	7.94	1.68	48200.3	1
O00400	ACATN_HUMAN	Acetyl-coenzyme A transporter 1 OS=Homo sapiens OX=9606 GN=SLC33A1 PE=1 SV=1	2	1	1	1	549	60.9	7.33	1.7	165351	1
Q02413	DSG1_HUMAN	Desmoglein-1 OS=Homo sapiens OX=9606 GN=DSG1 PE=1 SV=2	1	1	1	1	1049	113.7	5.03	2.26		1
Q9H334	FOXP1_HUMAN	Forkhead box protein P1 OS=Homo sapiens OX=9606 GN=FOXP1 PE=1 SV=1	2	1	1	1	677	75.3	6.67	0		1
Q9Y490	TLN1_HUMAN	Talin-1 OS=Homo sapiens OX=9606 GN=TLN1 PE=1 SV=3	0	1	1	1	2541	269.6	6.07	1.74	122092	1
Q9NXZ2	DDX43_HUMAN	Probable ATP-dependent RNA helicase DDX43 OS=Homo sapiens OX=9606 GN=DDX43 PE=2 SV=2	2	1	1	1	648	72.8	8.75	1.62		1
Q9NWZ5	UCKL1_HUMAN	Uridine-cytidine kinase-like 1 OS=Homo sapiens OX=9606 GN=UCKL1 PE=1 SV=2	2	1	1	1	548	61.1	7.36	1.66	112781	1
Q8TED1	GPX8_HUMAN	Probable glutathione peroxidase 8 OS=Homo sapiens OX=9606 GN=GPX8 PE=1 SV=2	5	1	1	1	209	23.9	9.35	2.25	686438	1
P08238	HS90B_HUMAN	Heat shock protein HSP 90-beta OS=Homo sapiens OX=9606 GN=HSP90AB1 PE=1 SV=4	2	1	1	1	724	83.2	5.03	2.06		1
O95831	AIFM1_HUMAN	Apoptosis-inducing factor 1, mitochondrial OS=Homo sapiens OX=9606 GN=AIFM1 PE=1 SV=1	1	1	1	1	613	66.9	8.95	2.43		1
P49411	EFTU_HUMAN	Elongation factor Tu, mitochondrial OS=Homo sapiens OX=9606 GN=TUFM PE=1 SV=2	3	1	1	1	452	49.5	7.61	2.48	303600	1
P12081	SYHC_HUMAN	Histidine--tRNA ligase, cytoplasmic OS=Homo sapiens OX=9606 GN=HARS PE=1 SV=2	2	1	1	1	509	57.4	5.88	0	163647	1
Q8NHV4	NEDD1_HUMAN	Protein NEDD1 OS=Homo sapiens OX=9606 GN=NEDD1 PE=1 SV=1	2	1	1	1	660	71.9	7.97	1.8	196254	1
Q9H967	WDR76_HUMAN	WD repeat-containing protein 76 OS=Homo sapiens OX=9606 GN=WDR76 PE=1 SV=2	1	1	1	1	626	69.7	9.25	1.75		1
Q9NRB3	CHSTC_HUMAN	Carbohydrate sulfotransferase 12 OS=Homo sapiens OX=9606 GN=CHST12 PE=2 SV=2	3	2	2	2	414	48.4	9.32	0	940262	1
Q7L5N7	PCAT2_HUMAN	Lysophosphatidylcholine acyltransferase 2 OS=Homo sapiens OX=9606 GN=LPCAT2 PE=1 SV=1	1	1	1	1	544	60.2	6.55	1.83	210715	1
O75947	ATP5H_HUMAN	ATP synthase subunit d, mitochondrial OS=Homo sapiens OX=9606 GN=ATP5PD PE=1 SV=3	16	2	2	2	161	18.5	5.3	0	312039	1
P46778	RL21_HUMAN	60S ribosomal protein L21 OS=Homo sapiens OX=9606 GN=RPL21 PE=1 SV=2	7	1	1	1	160	18.6	10.49	2.07	297103	1
Q96ME7	ZN512_HUMAN	Zinc finger protein 512 OS=Homo sapiens OX=9606 GN=ZNF512 PE=1 SV=2	2	1	1	1	567	64.6	9.76	1.84	327863	1
Q96I25	SPF45_HUMAN	Splicing factor 45 OS=Homo sapiens OX=9606 GN=RBM17 PE=1 SV=1	2	1	1	1	401	44.9	5.97	1.8	442153	1
Q8IVT5	KSR1_HUMAN	Kinase suppressor of Ras 1 OS=Homo sapiens OX=9606 GN=KSR1 PE=1 SV=3	1	1	1	1	923	102.1	8.66	2.06	506719	1
Q99615	DNJC7_HUMAN	DnaJ homolog subfamily C member 7 OS=Homo sapiens OX=9606 GN=DNAJC7 PE=1 SV=2	2	1	1	1	494	56.4	6.96	2.26	1.8961e+06	1
P06702	S10A9_HUMAN	Protein S100-A9 OS=Homo sapiens OX=9606 GN=S100A9 PE=1 SV=1	11	1	1	1	114	13.2	6.13	2.85	814962	1
Q96BH1	RNF25_HUMAN	E3 ubiquitin-protein ligase RNF25 OS=Homo sapiens OX=9606 GN=RNF25 PE=1 SV=1	2	1	1	1	459	51.2	6.54	2.09	333971	1
P01008	ANT3_HUMAN	Antithrombin-III OS=Homo sapiens OX=9606 GN=SERPINC1 PE=1 SV=1	2	1	1	1	464	52.6	6.71	2.48	1033146	1
Q9P2J5	SYLC_HUMAN	Leucine--tRNA ligase, cytoplasmic OS=Homo sapiens OX=9606 GN=LARS PE=1 SV=2	1	1	1	1	1176	134.4	7.3	2.84	276865	1
Q49A26	GLYR1_HUMAN	Putative oxidoreductase GLYR1 OS=Homo sapiens OX=9606 GN=GLYR1 PE=1 SV=4	2	1	1	1	553	60.5	9.17	0	36837	1
Q9UGP8	SEC63_HUMAN	Translocation protein SEC63 homolog OS=Homo sapiens OX=9606 GN=SEC63 PE=1 SV=2	2	1	1	1	760	87.9	5.31	0		1
Q9Y6A4	CFA20_HUMAN	Cilia- and flagella-associated protein 20 OS=Homo sapiens OX=9606 GN=CFAP20 PE=1 SV=1	6	1	1	1	193	22.8	9.76	1.77	22883964	1
P09622	DLDH_HUMAN	Dihydrolipoyl dehydrogenase, mitochondrial OS=Homo sapiens OX=9606 GN=DLD PE=1 SV=2	2	1	1	1	509	54.1	7.85	1.68	295823	1
O14828	SCAM3_HUMAN	Secretory carrier-associated membrane protein 3 OS=Homo sapiens OX=9606 GN=SCAMP3 PE=1 SV=3	5	1	1	1	347	38.3	7.64	0		1
O14965	AURKA_HUMAN	Aurora kinase A OS=Homo sapiens OX=9606 GN=AURKA PE=1 SV=2	3	1	1	1	403	45.8	9.39	0	47119.7	1
Q9BZI7	REN3B_HUMAN	Regulator of nonsense transcripts 3B OS=Homo sapiens OX=9606 GN=UPF3B PE=1 SV=1	2	1	1	1	483	57.7	9.48	1.74	474102	1
O75223	GGCT_HUMAN	Gamma-glutamylcyclotransferase OS=Homo sapiens OX=9606 GN=GGCT PE=1 SV=1	5	1	1	1	188	21	5.14	1.96		1
P98175	RBM10_HUMAN	RNA-binding protein 10 OS=Homo sapiens OX=9606 GN=RBM10 PE=1 SV=3	1	1	1	1	930	103.5	5.97	1.97		1
Q9H3P2	NELFA_HUMAN	Negative elongation factor A OS=Homo sapiens OX=9606 GN=NELFA PE=1 SV=3	3	1	1	1	528	57.2	9.03	2.1	197986	1
Q96AG4	LRC59_HUMAN	Leucine-rich repeat-containing protein 59 OS=Homo sapiens OX=9606 GN=LRRC59 PE=1 SV=1	4	1	1	1	307	34.9	9.57	2		1
Q15125	EBP_HUMAN	3-beta-hydroxysteroid-Delta(8),Delta(7)-isomerase OS=Homo sapiens OX=9606 GN=EBP PE=1 SV=3	4	1	1	1	230	26.3	7.9	1.77	353947	1
Q9P2Q2	FRM4A_HUMAN	FERM domain-containing protein 4A OS=Homo sapiens OX=9606 GN=FRMD4A PE=1 SV=3	1	1	1	1	1039	115.4	8.87	0		1
Q8ND71	GIMA8_HUMAN	GTPase IMAP family member 8 OS=Homo sapiens OX=9606 GN=GIMAP8 PE=2 SV=2	2	1	1	1	665	74.8	8.34	1.65	148357	1
Q92900	RENT1_HUMAN	Regulator of nonsense transcripts 1 OS=Homo sapiens OX=9606 GN=UPF1 PE=1 SV=2	1	1	1	1	1129	124.3	6.61	1.95		1
P31944	CASPE_HUMAN	Caspase-14 OS=Homo sapiens OX=9606 GN=CASP14 PE=1 SV=2	4	1	1	1	242	27.7	5.58	2.09	824545	1
Q8IY21	DDX60_HUMAN	Probable ATP-dependent RNA helicase DDX60 OS=Homo sapiens OX=9606 GN=DDX60 PE=1 SV=3	1	1	1	1	1712	197.7	7.59	1.63	93962.8	1
Q06330	SUH_HUMAN	Recombining binding protein suppressor of hairless OS=Homo sapiens OX=9606 GN=RBPJ PE=1 SV=3	2	1	1	1	500	55.6	7.18	1.81	180038	1
O14628	ZN195_HUMAN	Zinc finger protein 195 OS=Homo sapiens OX=9606 GN=ZNF195 PE=1 SV=2	1	1	1	1	629	72.3	8.09	0	278505	1
P61619	S61A1_HUMAN	Protein transport protein Sec61 subunit alpha isoform 1 OS=Homo sapiens OX=9606 GN=SEC61A1 PE=1 SV=2	2	1	1	1	476	52.2	8.06	2.2	1.4551e+06	1
P00450	CERU_HUMAN	Ceruloplasmin OS=Homo sapiens OX=9606 GN=CP PE=1 SV=1	1	1	1	1	1065	122.1	5.72	2.2	671452	1
Q9BYB0	SHAN3_HUMAN	SH3 and multiple ankyrin repeat domains protein 3 OS=Homo sapiens OX=9606 GN=SHANK3 PE=1 SV=3	0	1	1	1	1731	184.6	8.88	1.93	317901	1
Q13425	SNTB2_HUMAN	Beta-2-syntrophin OS=Homo sapiens OX=9606 GN=SNTB2 PE=1 SV=1	2	1	1	1	540	57.9	8.82	0	87705.1	1
O00541	PESC_HUMAN	Pescadillo homolog OS=Homo sapiens OX=9606 GN=PES1 PE=1 SV=1	2	1	1	1	588	68	7.33	0	351862	1
Q9BVS4	RIOK2_HUMAN	Serine/threonine-protein kinase RIO2 OS=Homo sapiens OX=9606 GN=RIOK2 PE=1 SV=2	3	1	1	1	552	63.2	5.94	0	41418.7	1
Q9UBV7	B4GT7_HUMAN	Beta-1,4-galactosyltransferase 7 OS=Homo sapiens OX=9606 GN=B4GALT7 PE=1 SV=1	2	1	1	1	327	37.4	8.98	0		1
Q15629	TRAM1_HUMAN	Translocating chain-associated membrane protein 1 OS=Homo sapiens OX=9606 GN=TRAM1 PE=1 SV=3	2	1	1	1	374	43	9.63	0	463001	1
Q8IXH7	NELFD_HUMAN	Negative elongation factor C/D OS=Homo sapiens OX=9606 GN=NELFCD PE=1 SV=2	2	1	1	1	590	66.2	5.1	0		1
Q00403	TF2B_HUMAN	Transcription initiation factor IIB OS=Homo sapiens OX=9606 GN=GTF2B PE=1 SV=1	3	1	1	1	316	34.8	8.35	0	87596.4	1
P00846	ATP6_HUMAN	ATP synthase subunit a OS=Homo sapiens OX=9606 GN=MT-ATP6 PE=1 SV=1	4	1	1	1	226	24.8	10.1	0	216217	1
Q5D862	FILA2_HUMAN	Filaggrin-2 OS=Homo sapiens OX=9606 GN=FLG2 PE=1 SV=1	2	1	1	1	2391	247.9	8.31	0		1
Q9Y6X3	SCC4_HUMAN	MAU2 chromatid cohesion factor homolog OS=Homo sapiens OX=9606 GN=MAU2 PE=1 SV=2	1	1	1	1	613	69	7.25	0	45462.7	1
Q9Y2U8	MAN1_HUMAN	Inner nuclear membrane protein Man1 OS=Homo sapiens OX=9606 GN=LEMD3 PE=1 SV=2	1	1	1	1	911	99.9	7.55	0		1
Q9BX40	LS14B_HUMAN	Protein LSM14 homolog B OS=Homo sapiens OX=9606 GN=LSM14B PE=1 SV=1	3	1	1	1	385	42	9.69	1.84		1
Q92544	TM9S4_HUMAN	Transmembrane 9 superfamily member 4 OS=Homo sapiens OX=9606 GN=TM9SF4 PE=1 SV=2	1	1	1	1	642	74.5	6.54	1.94	197402	1
Q16877	F264_HUMAN	6-phosphofructo-2-kinase/fructose-2,6-bisphosphatase 4 OS=Homo sapiens OX=9606 GN=PFKFB4 PE=2 SV=6	2	1	1	1	469	54	6.62	0	84117.1	1
P17029	ZKSC1_HUMAN	Zinc finger protein with KRAB and SCAN domains 1 OS=Homo sapiens OX=9606 GN=ZKSCAN1 PE=1 SV=3	1	1	1	1	563	63.6	7.05	1.92		1
P04004	VTNC_HUMAN	Vitronectin OS=Homo sapiens OX=9606 GN=VTN PE=1 SV=1	3	1	1	1	478	54.3	5.8	0	55007.6	1
P41180	CASR_HUMAN	Extracellular calcium-sensing receptor OS=Homo sapiens OX=9606 GN=CASR PE=1 SV=3	3	1	1	1	1078	120.6	5.9	0		1
Q9NSD9	SYFB_HUMAN	Phenylalanine--tRNA ligase beta subunit OS=Homo sapiens OX=9606 GN=FARSB PE=1 SV=3	2	1	2	1	589	66.1	6.84	1.93	233080	1
Q96NE9	FRMD6_HUMAN	FERM domain-containing protein 6 OS=Homo sapiens OX=9606 GN=FRMD6 PE=1 SV=1	2	1	1	1	622	72	7.46	0	124467	1
Q15678	PTN14_HUMAN	Tyrosine-protein phosphatase non-receptor type 14 OS=Homo sapiens OX=9606 GN=PTPN14 PE=1 SV=2	1	1	1	1	1187	135.2	8.31	2.58	774787	1
O94923	GLCE_HUMAN	D-glucuronyl C5-epimerase OS=Homo sapiens OX=9606 GN=GLCE PE=1 SV=3	1	1	1	1	617	70.1	8.97	1.8	572902	1
P52701	MSH6_HUMAN	DNA mismatch repair protein Msh6 OS=Homo sapiens OX=9606 GN=MSH6 PE=1 SV=2	1	1	1	1	1360	152.7	6.9	0	64337.6	1
Q8TDW4	ST7L_HUMAN	Suppressor of tumorigenicity 7 protein-like OS=Homo sapiens OX=9606 GN=ST7L PE=2 SV=1	1	1	1	1	575	64.7	7.53	1.79	319968	1
P23919	KTHY_HUMAN	Thymidylate kinase OS=Homo sapiens OX=9606 GN=DTYMK PE=1 SV=4	5	1	1	1	212	23.8	8.27	0	276282	1
Q9BVS5	TR61B_HUMAN	tRNA (adenine(58)-N(1))-methyltransferase, mitochondrial OS=Homo sapiens OX=9606 GN=TRMT61B PE=1 SV=2	1	1	1	1	477	52.9	6.62	0	282115	1
Q14694	UBP10_HUMAN	Ubiquitin carboxyl-terminal hydrolase 10 OS=Homo sapiens OX=9606 GN=USP10 PE=1 SV=2	2	1	1	1	798	87.1	5.31	0		1
P09012	SNRPA_HUMAN	U1 small nuclear ribonucleoprotein A OS=Homo sapiens OX=9606 GN=SNRPA PE=1 SV=3	3	1	1	1	282	31.3	9.83	1.64		1
Q9H0L4	CSTFT_HUMAN	Cleavage stimulation factor subunit 2 tau variant OS=Homo sapiens OX=9606 GN=CSTF2T PE=1 SV=1	1	1	1	1	616	64.4	7.25	0	280910	1
O94844	RHBT1_HUMAN	Rho-related BTB domain-containing protein 1 OS=Homo sapiens OX=9606 GN=RHOBTB1 PE=2 SV=2	3	1	1	1	696	79.4	6.87	0		1
P61254	RL26_HUMAN	60S ribosomal protein L26 OS=Homo sapiens OX=9606 GN=RPL26 PE=1 SV=1	5	1	1	1	145	17.2	10.55	0	294652	1
O95248	MTMR5_HUMAN	Myotubularin-related protein 5 OS=Homo sapiens OX=9606 GN=SBF1 PE=1 SV=4	1	1	1	1	1868	208.3	6.9	2.24	277118	1
Q53T94	TAF1B_HUMAN	TATA box-binding protein-associated factor RNA polymerase I subunit B OS=Homo sapiens OX=9606 GN=TAF1B PE=1 SV=1	2	1	1	1	588	68.8	8.02	0	17044	1
Q5FYB0	ARSJ_HUMAN	Arylsulfatase J OS=Homo sapiens OX=9606 GN=ARSJ PE=2 SV=1	1	1	1	1	599	67.2	9.01	0	335616	1
Q15070	OXA1L_HUMAN	Mitochondrial inner membrane protein OXA1L OS=Homo sapiens OX=9606 GN=OXA1L PE=1 SV=3	2	1	1	1	435	48.5	9.45	1.76	423246	1
Q8WWY7	WFD12_HUMAN	WAP four-disulfide core domain protein 12 OS=Homo sapiens OX=9606 GN=WFDC12 PE=1 SV=1	9	1	1	1	111	12	5.5	1.94	542157	1
Q03519	TAP2_HUMAN	Antigen peptide transporter 2 OS=Homo sapiens OX=9606 GN=TAP2 PE=1 SV=1	1	1	1	1	686	75.6	8.02	1.73	421300	1
Q9Y3C1	NOP16_HUMAN	Nucleolar protein 16 OS=Homo sapiens OX=9606 GN=NOP16 PE=1 SV=2	4	1	1	1	178	21.2	9.94	0	255886	1
P28300	LYOX_HUMAN	Protein-lysine 6-oxidase OS=Homo sapiens OX=9606 GN=LOX PE=1 SV=2	2	1	1	1	417	46.9	8.09	0	75950.8	1
P09543	CN37_HUMAN	2',3'-cyclic-nucleotide 3'-phosphodiesterase OS=Homo sapiens OX=9606 GN=CNP PE=1 SV=2	2	1	1	1	421	47.5	9.07	0		1
Q9BTV5	FSD1_HUMAN	Fibronectin type III and SPRY domain-containing protein 1 OS=Homo sapiens OX=9606 GN=FSD1 PE=1 SV=1	2	1	1	1	496	55.8	6.99	0	1.66501e+06	1
Q13123	RED_HUMAN	Protein Red OS=Homo sapiens OX=9606 GN=IK PE=1 SV=3	2	1	1	1	557	65.6	6.64	0	2.40694e+06	1
Q96P11	NSUN5_HUMAN	Probable 28S rRNA (cytosine-C(5))-methyltransferase OS=Homo sapiens OX=9606 GN=NSUN5 PE=1 SV=2	2	1	1	1	429	46.7	8.62	0	101288	1
Q9H0U3	MAGT1_HUMAN	Magnesium transporter protein 1 OS=Homo sapiens OX=9606 GN=MAGT1 PE=1 SV=1	2	1	1	1	335	38	9.63	2.21	1.28185e+06	1
Q9BUI4	RPC3_HUMAN	DNA-directed RNA polymerase III subunit RPC3 OS=Homo sapiens OX=9606 GN=POLR3C PE=1 SV=1	2	1	1	1	534	60.6	7.31	0	536584	1
O00567	NOP56_HUMAN	Nucleolar protein 56 OS=Homo sapiens OX=9606 GN=NOP56 PE=1 SV=4	1	1	1	1	594	66	9.19	1.87	317821	1
Q86YV0	RASL3_HUMAN	RAS protein activator like-3 OS=Homo sapiens OX=9606 GN=RASAL3 PE=1 SV=2	1	1	1	1	1011	111.8	8.75	0		1
P78527	PRKDC_HUMAN	DNA-dependent protein kinase catalytic subunit OS=Homo sapiens OX=9606 GN=PRKDC PE=1 SV=3	0	1	1	1	4128	468.8	7.12	0		1
Q9H5U6	ZCHC4_HUMAN	rRNA N6-adenosine-methyltransferase ZCCHC4 OS=Homo sapiens OX=9606 GN=ZCCHC4 PE=1 SV=3	2	1	1	1	513	59	8.75	0	96244.2	1
P42858	HD_HUMAN	Huntingtin OS=Homo sapiens OX=9606 GN=HTT PE=1 SV=2	1	1	1	1	3142	347.4	6.2	0		1
Q96T37	RBM15_HUMAN	RNA-binding protein 15 OS=Homo sapiens OX=9606 GN=RBM15 PE=1 SV=2	1	1	1	1	977	107.1	10.08	0	288269	1
Q6ZU15	SEP14_HUMAN	Septin-14 OS=Homo sapiens OX=9606 GN=SEPT14 PE=1 SV=2	2	1	1	1	432	50	6.24	1.87		1
Q13435	SF3B2_HUMAN	Splicing factor 3B subunit 2 OS=Homo sapiens OX=9606 GN=SF3B2 PE=1 SV=2	1	1	1	1	895	100.2	5.67	0		1
Q96HS1	PGAM5_HUMAN	Serine/threonine-protein phosphatase PGAM5, mitochondrial OS=Homo sapiens OX=9606 GN=PGAM5 PE=1 SV=2	2	1	1	1	289	32	8.68	0	985655	1
P01037	CYTN_HUMAN	Cystatin-SN OS=Homo sapiens OX=9606 GN=CST1 PE=1 SV=3	13	1	1	1	141	16.4	7.21	0	182098	1
Q9UG63	ABCF2_HUMAN	ATP-binding cassette sub-family F member 2 OS=Homo sapiens OX=9606 GN=ABCF2 PE=1 SV=2	2	1	1	1	623	71.2	7.37	1.69		1
Q14680	MELK_HUMAN	Maternal embryonic leucine zipper kinase OS=Homo sapiens OX=9606 GN=MELK PE=1 SV=3	2	1	1	1	651	74.6	8.72	0		1
Q9NQW6	ANLN_HUMAN	Anillin OS=Homo sapiens OX=9606 GN=ANLN PE=1 SV=2	1	1	1	1	1124	124.1	8.07	1.93	349458	1
Q10469	MGAT2_HUMAN	Alpha-1,6-mannosyl-glycoprotein 2-beta-N-acetylglucosaminyltransferase OS=Homo sapiens OX=9606 GN=MGAT2 PE=1 SV=1	2	1	1	1	447	51.5	8.76	0	166650	1
Q15005	SPCS2_HUMAN	Signal peptidase complex subunit 2 OS=Homo sapiens OX=9606 GN=SPCS2 PE=1 SV=3	4	1	1	1	226	25	8.47	0	395215	1
Q6PF15	KLH35_HUMAN	Kelch-like protein 35 OS=Homo sapiens OX=9606 GN=KLHL35 PE=1 SV=3	1	1	1	1	583	62.9	7.83	2.05	1.16588e+06	1
Q9UIX4	KCNG1_HUMAN	Potassium voltage-gated channel subfamily G member 1 OS=Homo sapiens OX=9606 GN=KCNG1 PE=1 SV=1	1	1	1	1	513	57.9	6.29	1.7	461906	1
Q68D10	SPT2_HUMAN	Protein SPT2 homolog OS=Homo sapiens OX=9606 GN=SPTY2D1 PE=1 SV=3	2	1	1	1	685	75.6	9.79	0	321253	1
O14735	CDIPT_HUMAN	CDP-diacylglycerol--inositol 3-phosphatidyltransferase OS=Homo sapiens OX=9606 GN=CDIPT PE=1 SV=1	6	1	1	1	213	23.5	8.03	0	50782	1
Q9C0D2	CE295_HUMAN	Centrosomal protein of 295 kDa OS=Homo sapiens OX=9606 GN=CEP295 PE=1 SV=4	1	1	1	1	2601	295	6	0	283238	1
P50914	RL14_HUMAN	60S ribosomal protein L14 OS=Homo sapiens OX=9606 GN=RPL14 PE=1 SV=4	6	1	1	1	215	23.4	10.93	0	219045	1
Q8TEC5	SH3R2_HUMAN	E3 ubiquitin-protein ligase SH3RF2 OS=Homo sapiens OX=9606 GN=SH3RF2 PE=1 SV=3	1	1	1	1	729	79.3	9.94	1.7	11425808	1
P51511	MMP15_HUMAN	Matrix metalloproteinase-15 OS=Homo sapiens OX=9606 GN=MMP15 PE=1 SV=1	1	1	1	1	669	75.8	7.46	1.62	276630	1
Q8IWR0	Z3H7A_HUMAN	Zinc finger CCCH domain-containing protein 7A OS=Homo sapiens OX=9606 GN=ZC3H7A PE=1 SV=1	1	1	1	1	971	110.5	7.3	0	348955	1
Q01813	PFKAP_HUMAN	ATP-dependent 6-phosphofructokinase, platelet type OS=Homo sapiens OX=9606 GN=PFKP PE=1 SV=2	1	1	1	1	784	85.5	7.55	0	411580	1
Q14533	KRT81_HUMAN	Keratin, type II cuticular Hb1 OS=Homo sapiens OX=9606 GN=KRT81 PE=1 SV=3	2	1	1	1	505	54.9	5.47	1.8	1.16654e+06	1
Q8WWY3	PRP31_HUMAN	U4/U6 small nuclear ribonucleoprotein Prp31 OS=Homo sapiens OX=9606 GN=PRPF31 PE=1 SV=2	3	1	1	1	499	55.4	5.78	0		1
Q6UXY1	BI2L2_HUMAN	Brain-specific angiogenesis inhibitor 1-associated protein 2-like protein 2 OS=Homo sapiens OX=9606 GN=BAIAP2L2 PE=1 SV=1	3	1	1	1	529	59	9.51	0	381762	1
Q9P291	ARMX1_HUMAN	Armadillo repeat-containing X-linked protein 1 OS=Homo sapiens OX=9606 GN=ARMCX1 PE=1 SV=1	2	1	1	1	453	49.2	9.22	0	285259	1
Q7Z6G8	ANS1B_HUMAN	Ankyrin repeat and sterile alpha motif domain-containing protein 1B OS=Homo sapiens OX=9606 GN=ANKS1B PE=1 SV=2	1	1	1	1	1248	138	6.37	2.12	2256980	1
P62854	RS26_HUMAN	40S ribosomal protein S26 OS=Homo sapiens OX=9606 GN=RPS26 PE=1 SV=3	8	1	1	1	115	13	11	1.95	1.16629e+06	1
Q5SNV9	CA167_HUMAN	Uncharacterized protein C1orf167 OS=Homo sapiens OX=9606 GN=C1orf167 PE=2 SV=2	1	1	1	1	1468	162.3	10.7	0	1.20583e+06	1
Q8IZ83	A16A1_HUMAN	Aldehyde dehydrogenase family 16 member A1 OS=Homo sapiens OX=9606 GN=ALDH16A1 PE=1 SV=2	1	1	1	1	802	85.1	6.79	0	1589764	1
O75530	EED_HUMAN	Polycomb protein EED OS=Homo sapiens OX=9606 GN=EED PE=1 SV=2	2	1	1	1	441	50.2	7.03	0	720318	1
O96024	B3GT4_HUMAN	Beta-1,3-galactosyltransferase 4 OS=Homo sapiens OX=9606 GN=B3GALT4 PE=1 SV=1	2	1	1	1	378	41.5	8.31	0	3.37252e+06	1
P41162	ETV3_HUMAN	ETS translocation variant 3 OS=Homo sapiens OX=9606 GN=ETV3 PE=1 SV=2	2	1	1	1	512	57	8.57	0	256248	1
Q9Y5M8	SRPRB_HUMAN	Signal recognition particle receptor subunit beta OS=Homo sapiens OX=9606 GN=SRPRB PE=1 SV=3	2	1	1	1	271	29.7	9.04	0	285090	1
O14974	MYPT1_HUMAN	Protein phosphatase 1 regulatory subunit 12A OS=Homo sapiens OX=9606 GN=PPP1R12A PE=1 SV=1	1	1	1	1	1030	115.2	5.4	0	1603490	1
Q8IZS8	CA2D3_HUMAN	Voltage-dependent calcium channel subunit alpha-2/delta-3 OS=Homo sapiens OX=9606 GN=CACNA2D3 PE=1 SV=1	2	1	1	1	1091	122.9	5.78	0	88911.6	1
P07360	CO8G_HUMAN	Complement component C8 gamma chain OS=Homo sapiens OX=9606 GN=C8G PE=1 SV=3	3	1	1	1	202	22.3	8.31	0	492553	1
Q2TB18	ASTE1_HUMAN	Protein asteroid homolog 1 OS=Homo sapiens OX=9606 GN=ASTE1 PE=1 SV=1	1	1	1	1	679	77	8.06	1.68		1
P28331	NDUS1_HUMAN	NADH-ubiquinone oxidoreductase 75 kDa subunit, mitochondrial OS=Homo sapiens OX=9606 GN=NDUFS1 PE=1 SV=3	1	1	1	1	727	79.4	6.23	0	436176	1
Q71RC2	LARP4_HUMAN	La-related protein 4 OS=Homo sapiens OX=9606 GN=LARP4 PE=1 SV=3	1	1	1	1	724	80.5	6.61	1.77	190073	1
O75352	MPU1_HUMAN	Mannose-P-dolichol utilization defect 1 protein OS=Homo sapiens OX=9606 GN=MPDU1 PE=1 SV=2	6	1	1	1	247	26.6	8.94	0		1
Q9HDC9	APMAP_HUMAN	Adipocyte plasma membrane-associated protein OS=Homo sapiens OX=9606 GN=APMAP PE=1 SV=2	2	1	1	1	416	46.5	6.16	0	902051	1
Q8N6G5	CGAT2_HUMAN	Chondroitin sulfate N-acetylgalactosaminyltransferase 2 OS=Homo sapiens OX=9606 GN=CSGALNACT2 PE=1 SV=1	2	1	1	1	542	62.5	5.73	0		1
Q5W0U4	BSPRY_HUMAN	B box and SPRY domain-containing protein OS=Homo sapiens OX=9606 GN=BSPRY PE=2 SV=1	1	1	1	1	402	44.4	6.42	1.74	2144953	1
P40394	ADH7_HUMAN	Alcohol dehydrogenase class 4 mu/sigma chain OS=Homo sapiens OX=9606 GN=ADH7 PE=1 SV=2	2	1	1	1	386	41.5	7.85	0	1.3983e+06	1
Q8IUR6	CRERF_HUMAN	CREB3 regulatory factor OS=Homo sapiens OX=9606 GN=CREBRF PE=1 SV=2	1	1	1	1	639	72.1	4.87	0	899212	1
P25205	MCM3_HUMAN	DNA replication licensing factor MCM3 OS=Homo sapiens OX=9606 GN=MCM3 PE=1 SV=3	1	1	1	1	808	90.9	5.77	0	1.05274e+06	1
Q9Y5J1	UTP18_HUMAN	U3 small nucleolar RNA-associated protein 18 homolog OS=Homo sapiens OX=9606 GN=UTP18 PE=1 SV=3	2	1	1	1	556	62	8.76	0	272064	1
P32969	RL9_HUMAN	60S ribosomal protein L9 OS=Homo sapiens OX=9606 GN=RPL9 PE=1 SV=1	4	1	1	1	192	21.9	9.95	2.05	785397	1
Q13617	CUL2_HUMAN	Cullin-2 OS=Homo sapiens OX=9606 GN=CUL2 PE=1 SV=2	1	1	1	1	745	86.9	6.92	2.04	1749224	1
Q7Z7A4	PXK_HUMAN	PX domain-containing protein kinase-like protein OS=Homo sapiens OX=9606 GN=PXK PE=1 SV=1	1	1	1	1	578	64.9	9.35	0	1.30091e+06	1
Q12891	HYAL2_HUMAN	Hyaluronidase-2 OS=Homo sapiens OX=9606 GN=HYAL2 PE=1 SV=4	1	1	1	1	473	53.8	8.19	1.69	470416	1
Q96LC7	SIG10_HUMAN	Sialic acid-binding Ig-like lectin 10 OS=Homo sapiens OX=9606 GN=SIGLEC10 PE=1 SV=3	1	1	1	1	697	76.5	8.35	0		1
Q9H8M7	MINY3_HUMAN	Ubiquitin carboxyl-terminal hydrolase MINDY-3 OS=Homo sapiens OX=9606 GN=MINDY3 PE=1 SV=1	9	1	1	1	445	49.7	4.77	0	63409.7	1
O76021	RL1D1_HUMAN	Ribosomal L1 domain-containing protein 1 OS=Homo sapiens OX=9606 GN=RSL1D1 PE=1 SV=3	2	1	1	1	490	54.9	10.13	0	160373	1
Q8NB25	F184A_HUMAN	Protein FAM184A OS=Homo sapiens OX=9606 GN=FAM184A PE=2 SV=3	1	1	1	1	1140	132.9	5.83	1.77	2.29616e+06	1
Q9NWY4	HPF1_HUMAN	Histone PARylation factor 1 OS=Homo sapiens OX=9606 GN=HPF1 PE=1 SV=2	3	1	1	1	346	39.4	6.8	0	56548.6	1
Q96M83	CCDC7_HUMAN	Coiled-coil domain-containing protein 7 OS=Homo sapiens OX=9606 GN=CCDC7 PE=2 SV=3	1	1	1	1	1385	157.4	7.58	0	3739630	1
P33240	CSTF2_HUMAN	Cleavage stimulation factor subunit 2 OS=Homo sapiens OX=9606 GN=CSTF2 PE=1 SV=1	2	1	1	1	577	60.9	6.83	1.98		1
O75962	TRIO_HUMAN	Triple functional domain protein OS=Homo sapiens OX=9606 GN=TRIO PE=1 SV=2	0	1	1	1	3097	346.7	6.37	0	664535	1
P05165	PCCA_HUMAN	Propionyl-CoA carboxylase alpha chain, mitochondrial OS=Homo sapiens OX=9606 GN=PCCA PE=1 SV=4	1	1	1	1	728	80	7.52	0	702782	1
P51648	AL3A2_HUMAN	Fatty aldehyde dehydrogenase OS=Homo sapiens OX=9606 GN=ALDH3A2 PE=1 SV=1	2	1	1	1	485	54.8	7.88	0		1
Q13393	PLD1_HUMAN	Phospholipase D1 OS=Homo sapiens OX=9606 GN=PLD1 PE=1 SV=1	1	1	1	1	1074	124.1	8.78	0	12693579	1
P53667	LIMK1_HUMAN	LIM domain kinase 1 OS=Homo sapiens OX=9606 GN=LIMK1 PE=1 SV=3	1	1	1	1	647	72.5	6.98	0	126882	1
Q96HW7	INT4_HUMAN	Integrator complex subunit 4 OS=Homo sapiens OX=9606 GN=INTS4 PE=1 SV=2	1	1	1	1	963	108.1	6.44	0	237613	1
