# Supplementary material for: Exosomal circRNA-100338 promotes hepatocellular carcinoma metastasis via enhancing invasiveness and angiogenesis
Source: J Exp Clin Cancer Res. 2020 Jan 23;39:20. doi: 10.1186/s13046-020-1529-9 (PMC6979009; doi:10.1186/s13046-020-1529-9)
Supplement: Supplementary file 9 — Additional file 9: Figure S6C. [file 13046_2020_1529_MOESM9_ESM.xlsx]

## Sheet: Figure 6C
			Figure 6C
					MVD (n)
				case	Pulmonary metastases	Primary HCC
			(Post/Pre)Low group (n=5)	1	33	51
					37	44
					29	52
					22	56
					35	60
				2	50	42
					45	41
					25	61
					46	48
					44	39
				3	41	48
					25	43
					35	47
					36	55
					39	38
				4	28	50
					40	42
					34	40
					35	39
					21	50
				5	29	51
					42	42
					24	33
					28	45
					35	35
			(Post/Pre)High group (n=8)	1	42	67
					45	69
					58	62
					48	52
					25	57
				2	37	41
					38	68
					29	65
					60	46
					47	57
				3	48	52
					42	53
					30	61
					29	49
					19	58
				4	51	43
					55	64
					42	59
					47	57
					31	63
				5	38	73
					36	61
					29	57
					44	54
					54	58
				6	51	52
					42	54
					37	55
					50	60
					42	65
				7	36	38
					54	47
					48	60
					45	49
					28	45
				8	42	46
					40	44
					38	50
					44	52
					37	54
					Ki67 (%)
				case	Pulmonary metastases	Primary HCC
			(Post/Pre)Low group (n=5)	1	67.7	79.3
					52.4	77.7
					54.3	58.8
					35.4	84.8
					38.8	86.2
				2	57.7	88.5
					60.4	68.3
					54.8	66.8
					37.9	48.8
					66.8	60.2
				3	58.6	64.6
					50.3	64.4
					67.6	73.7
					58.8	75.4
					55.6	76.3
				4	66.6	85.2
					37.9	74.6
					57.2	74.1
					55.3	55.8
					43.8	53.6
				5	68.3	52.4
					45.7	64.3
					57.4	62.7
					64.3	55.4
					67.4	55.2
			(Post/Pre)High group (n=8)	1	60.9	87.3
					58.2	84.6
					78.1	86.4
					58.9	77.9
					80.4	83.5
				2	86.9	88.6
					64.3	84.4
					63.7	64.5
					59.8	80.2
					77.1	69.2
				3	49.1	58.8
					79.6	85.7
					75.4	86.6
					80.2	88.8
					81.5	86.2
				4	66.8	84.4
					77.4	82.3
					79.5	85.6
					63.3	88.1
					66.7	85.8
				5	84.4	86.7
					72.9	72.9
					78.6	86.4
					82.3	83.6
					59.4	79.1
				6	66.7	83.3
					68.4	80.8
					87.6	82.3
					77.9	59.9
					89.8	85.4
				7	85.4	78.9
					89.8	46.8
					57.9	60.4
					41.4	86.3
					66.8	73.8
				8	58.7	87.3
					84.2	76.4
					66.9	85.8
					64.3	55.4
					70.8	83.7
